# Supplementary material
Source: PubMed Central journal article supplement (PMC4924580)

# **Synthesis and Antimalarial Activity of Mallatojaponin C and Related Compounds**

Alexander L. Eaton, Seema Dalal, M. Belen Cassera, Shuqi Zhao, and David G. I. Kingston

## **Supporting Information**

## Supporting Information

|                                                                                   |    |
|-----------------------------------------------------------------------------------|----|
| S1. $^1\text{H}$ NMR of <b>1</b> ( $\text{CDCl}_3$ , 400 MHz) .....               | 3  |
| S2. $^1\text{H}$ NMR of <b>5</b> ( $(\text{CD}_3)_2\text{SO}$ , 400 MHz) .....    | 4  |
| S3. $^{13}\text{C}$ NMR of <b>5</b> ( $(\text{CD}_3)_2\text{SO}$ , 100 MHz) ..... | 5  |
| S4. $^1\text{H}$ NMR of <b>6</b> ( $\text{CDCl}_3$ , 400 MHz) .....               | 6  |
| S5. $^{13}\text{C}$ NMR of <b>6</b> ( $\text{CDCl}_3$ , 100 MHz) .....            | 7  |
| S6. $^1\text{H}$ NMR of <b>7</b> ( $\text{CDCl}_3$ , 400 MHz) .....               | 8  |
| S7. $^{13}\text{C}$ NMR of <b>7</b> ( $\text{CDCl}_3$ , 100 MHz) .....            | 9  |
| S8. $^1\text{H}$ NMR of <b>8</b> ( $(\text{CD}_3)_2\text{SO}$ , 400 MHz) .....    | 10 |
| S9. $^{13}\text{C}$ NMR of <b>8</b> ( $(\text{CD}_3)_2\text{SO}$ , 100 MHz) ..... | 11 |
| S10. $^1\text{H}$ NMR of <b>9</b> ( $\text{CDCl}_3$ , 400 MHz) .....              | 12 |
| S11. $^{13}\text{C}$ NMR of <b>9</b> ( $\text{CDCl}_3$ , 100 MHz) .....           | 13 |
| S12. $^1\text{H}$ NMR of <b>11</b> ( $\text{CD}_3\text{OD}$ , 400 MHz) .....      | 14 |
| S13. $^{13}\text{C}$ NMR of <b>11</b> ( $\text{CD}_3\text{OD}$ , 100 MHz) .....   | 15 |
| S14. $^1\text{H}$ NMR of <b>12</b> ( $\text{CDCl}_3$ , 400 MHz) .....             | 16 |
| S15. $^{13}\text{C}$ NMR of <b>12</b> ( $\text{CDCl}_3$ , 100 MHz) .....          | 17 |
| S16. $^1\text{H}$ NMR of <b>13</b> ( $\text{CDCl}_3$ , 400 MHz) .....             | 18 |
| S17. $^{13}\text{C}$ NMR of <b>13</b> ( $\text{CDCl}_3$ , 100 MHz) .....          | 19 |
| S18. $^1\text{H}$ NMR of <b>14</b> ( $\text{CD}_3\text{OD}$ , 400 MHz) .....      | 20 |
| S19. $^{13}\text{C}$ NMR of <b>14</b> ( $\text{CD}_3\text{OD}$ , 100 MHz) .....   | 21 |
| S20. $^1\text{H}$ NMR of <b>16</b> ( $\text{CD}_3\text{OD}$ , 400 MHz) .....      | 22 |
| S21. $^{13}\text{C}$ NMR of <b>16</b> ( $\text{CD}_3\text{OD}$ , 100 MHz) .....   | 23 |
| S22. $^1\text{H}$ NMR of <b>17</b> ( $\text{CDCl}_3$ , 400 MHz) .....             | 24 |
| S23. $^1\text{H}$ NMR of <b>17</b> ( $\text{CD}_3\text{OD}$ , 400 MHz) .....      | 25 |
| S24. $^{13}\text{C}$ NMR of <b>17</b> ( $\text{CD}_3\text{OD}$ , 100 MHz) .....   | 26 |
| S25. $^1\text{H}$ NMR of <b>18</b> ( $\text{CD}_3\text{OD}$ , 400 MHz) .....      | 27 |
| S26. $^{13}\text{C}$ NMR of <b>18</b> ( $\text{CD}_3\text{OD}$ , 100 MHz) .....   | 28 |
| S27. $^1\text{H}$ NMR of <b>19</b> ( $\text{CDCl}_3$ , 500 MHz) .....             | 29 |
| S28. HPLC of <b>11</b> .....                                                      | 30 |
| S29. HPLC of <b>12</b> .....                                                      | 31 |
| S30. HPLC of <b>13</b> .....                                                      | 32 |
| S31. HPLC of <b>16</b> .....                                                      | 33 |
| S32. HPLC of <b>17</b> .....                                                      | 34 |
| S33. HPLC of <b>18</b> .....                                                      | 35 |

S3. <sup>1</sup>H NMR of **1** (CDCl<sub>3</sub>, 400 MHz)

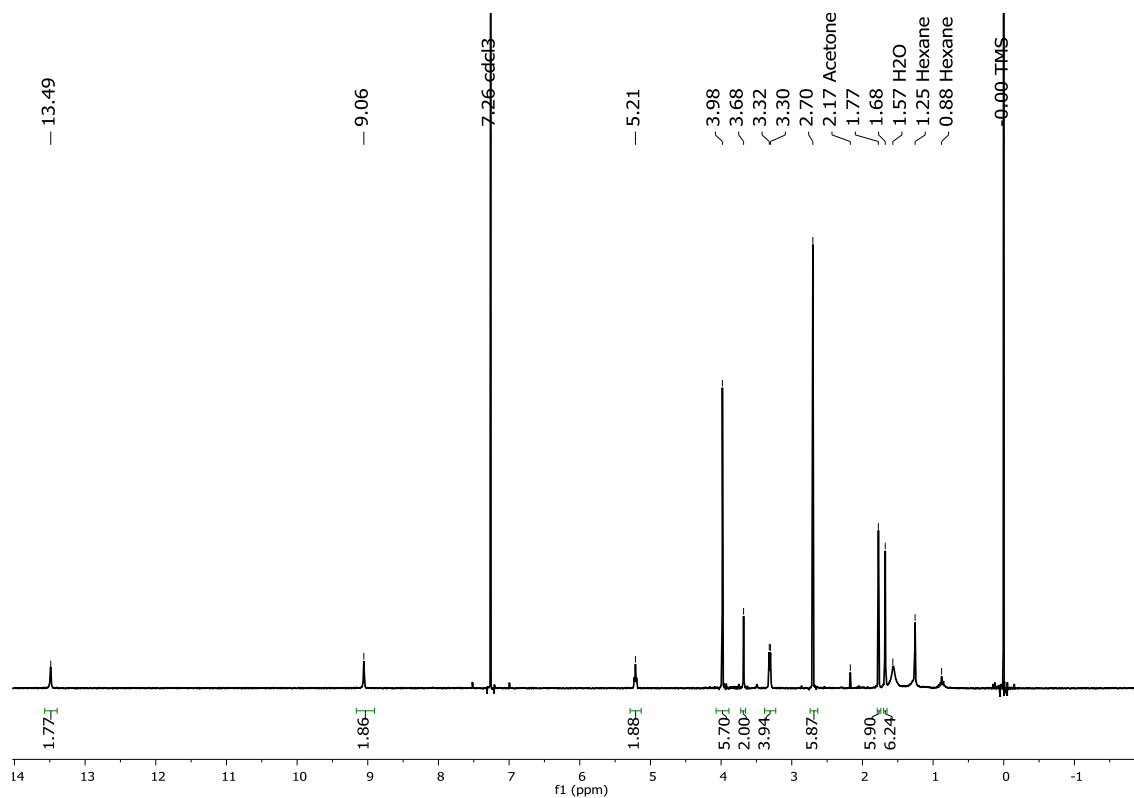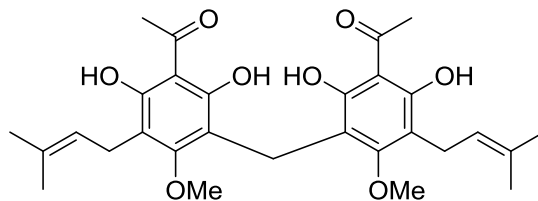

S4.  $^1\text{H}$  NMR of **5** ( $(\text{CD}_3)_2\text{SO}$ , 400 MHz)

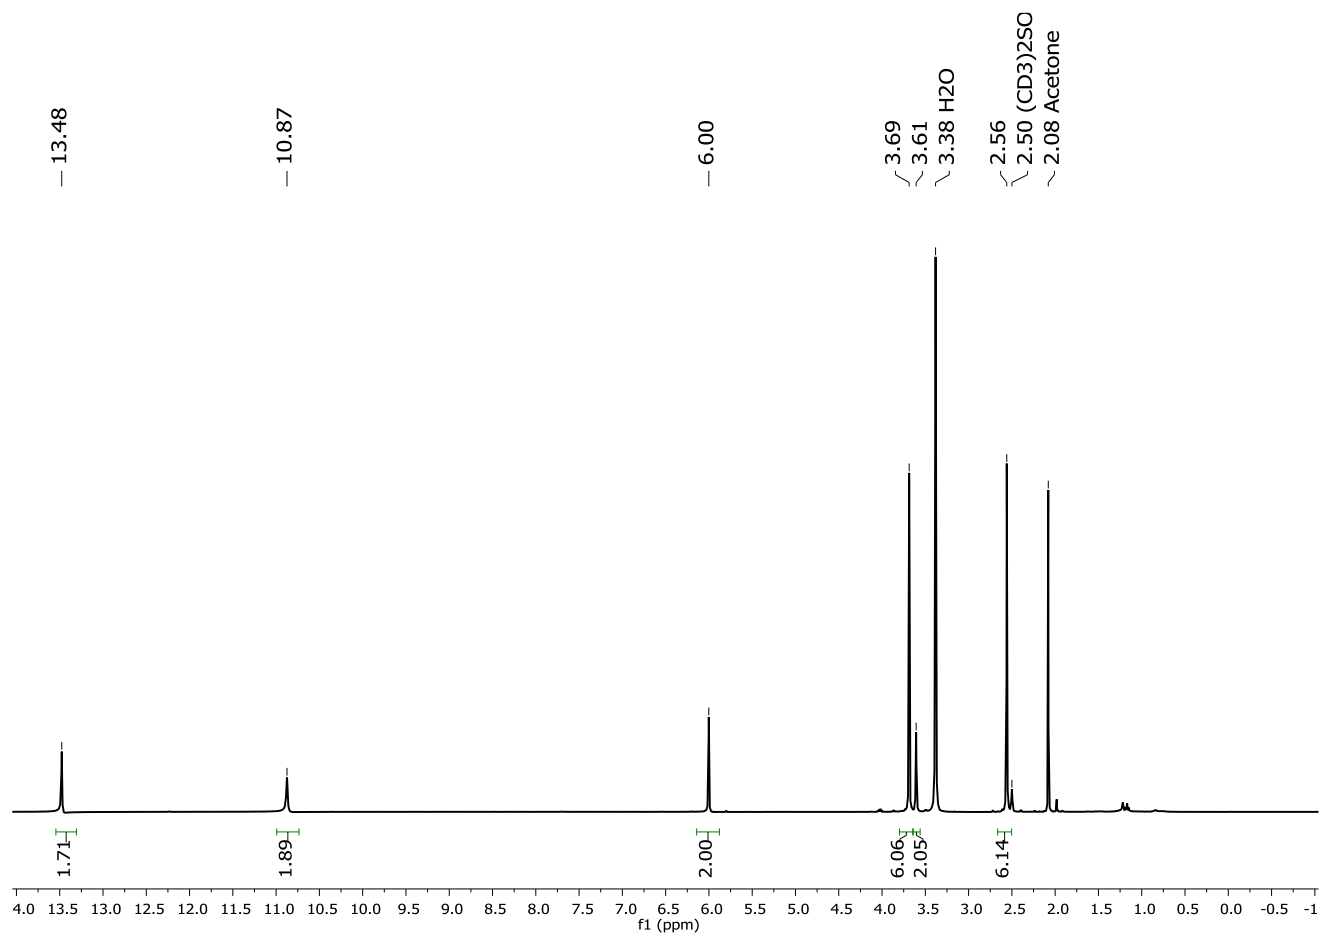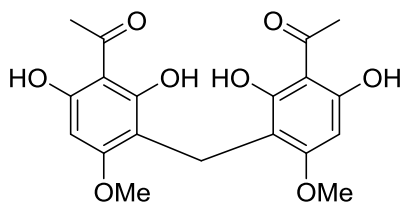

S5.  $^{13}\text{C}$  NMR of **5** ( $(\text{CD}_3)_2\text{SO}$ , 100 MHz)

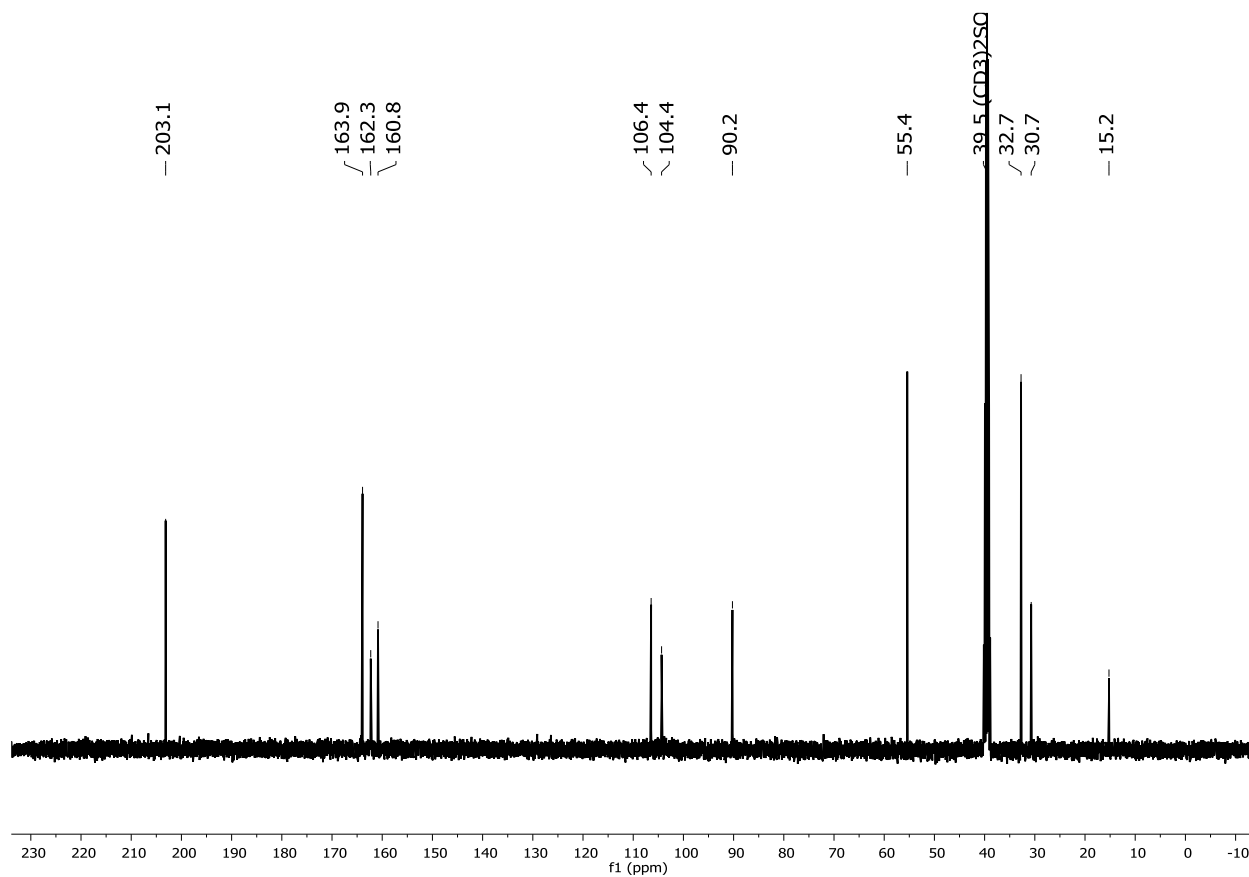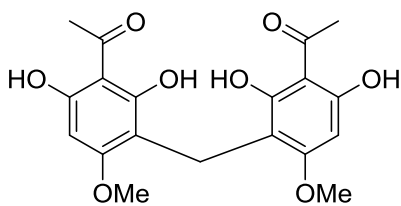

S6. <sup>1</sup>H NMR of **6** (CDCl<sub>3</sub>, 400 MHz)

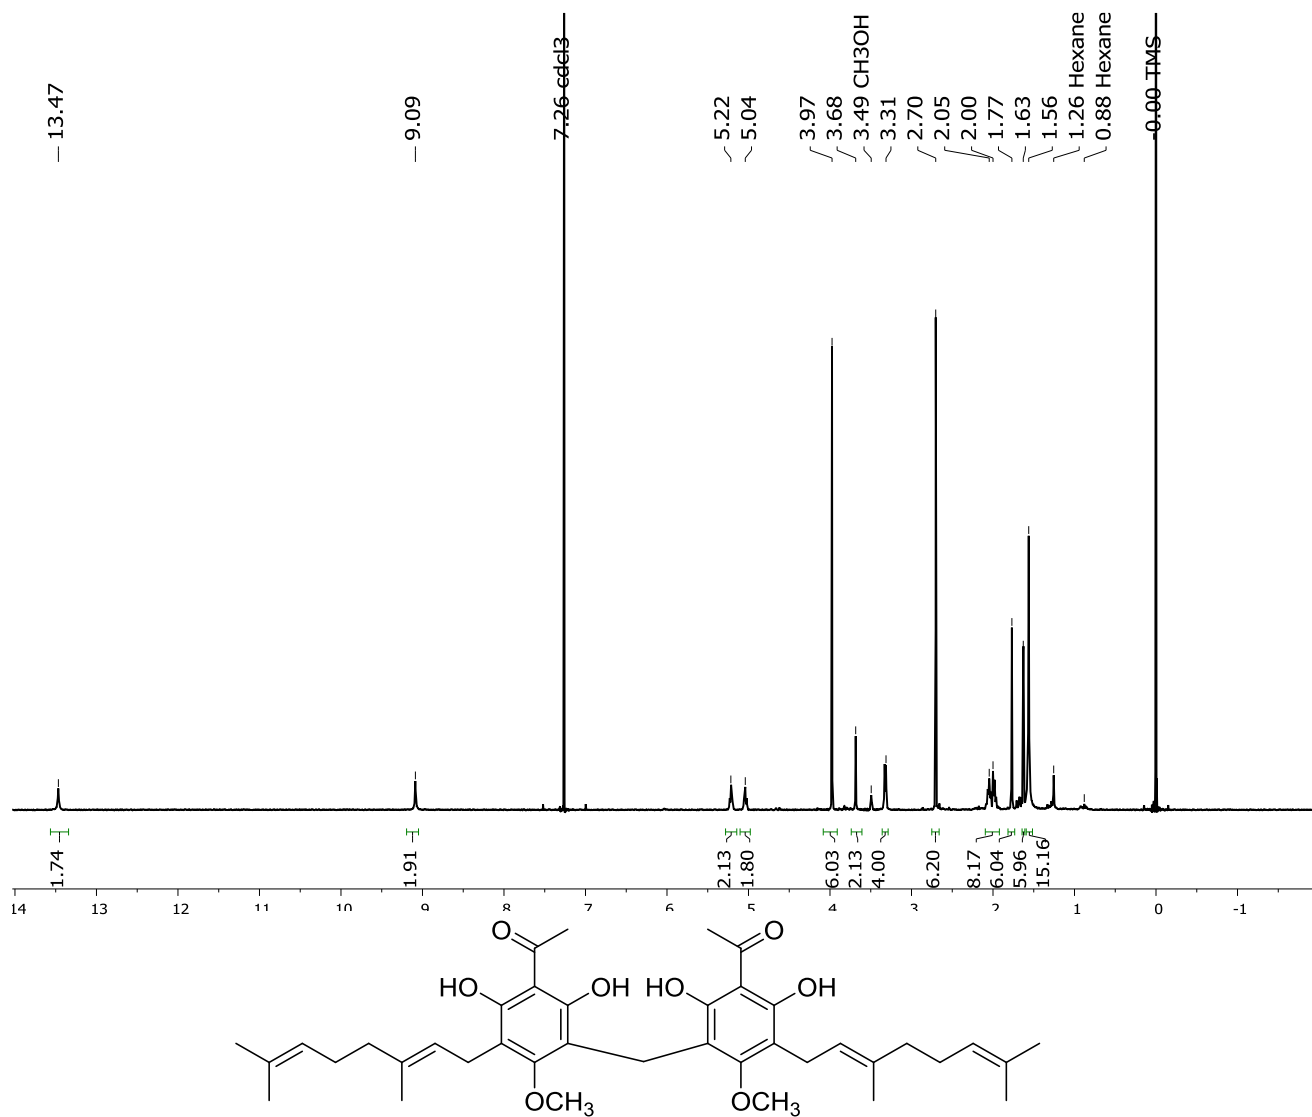

S7.  $^{13}\text{C}$  NMR of **6** ( $\text{CDCl}_3$ , 100 MHz)

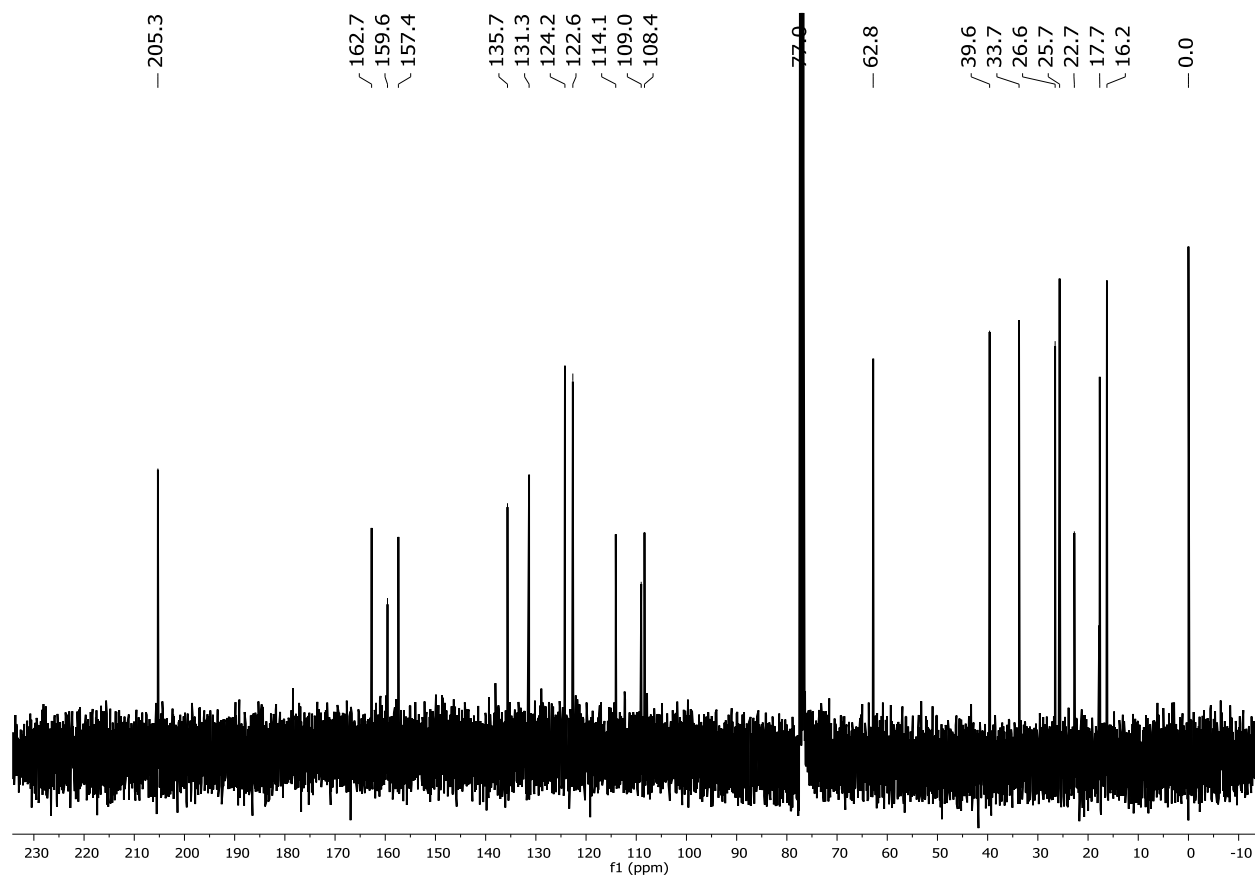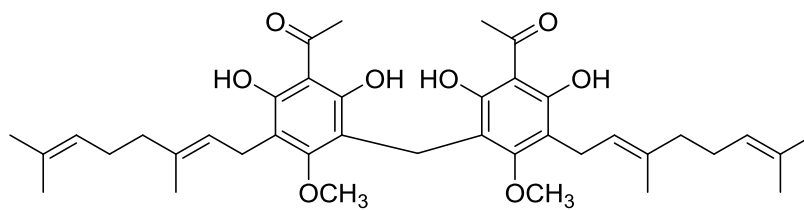

S8.  $^1\text{H}$  NMR of **7** ( $\text{CDCl}_3$ , 400 MHz)

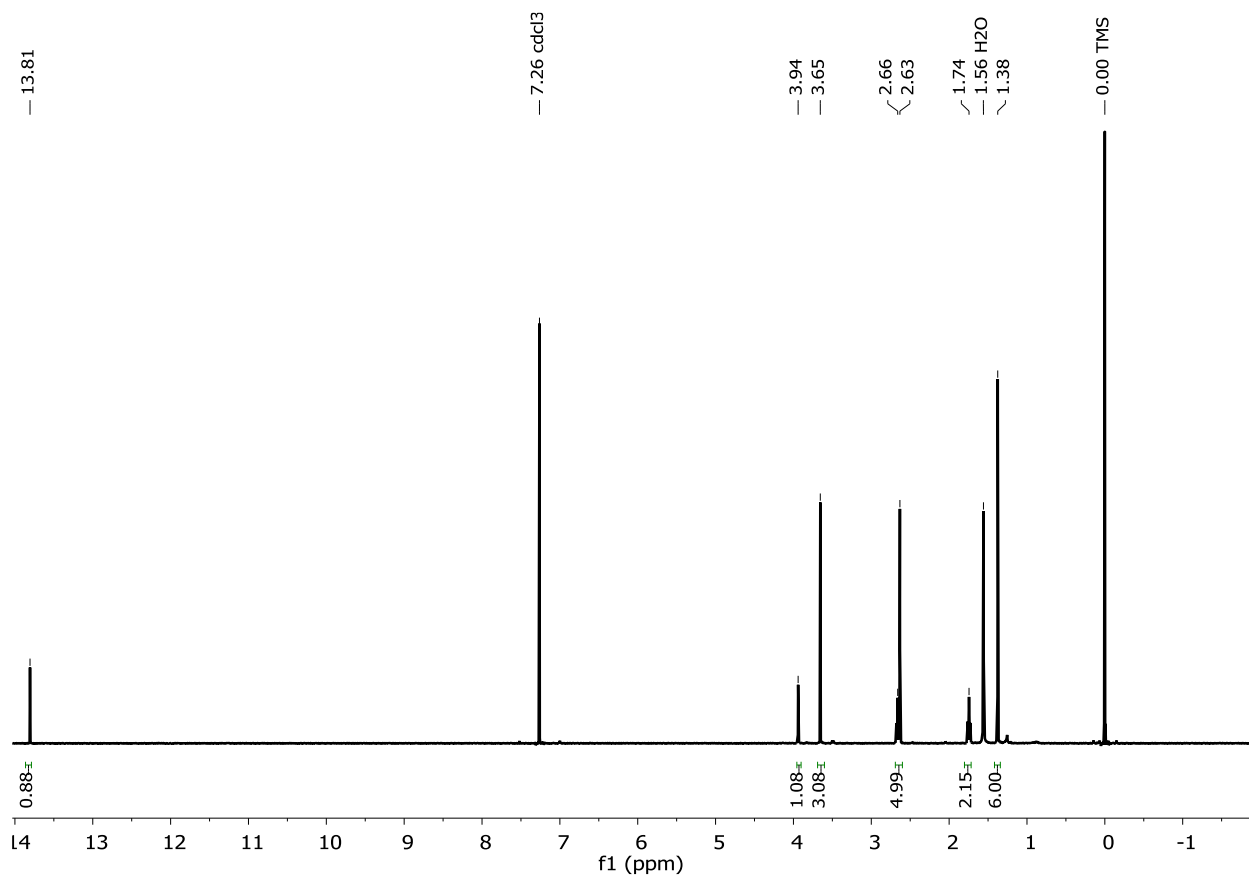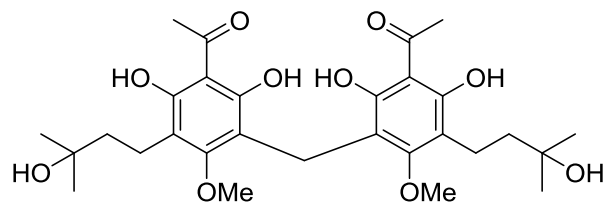



S9.  $^{13}\text{C}$  NMR of **7** ( $\text{CDCl}_3$ , 100 MHz)

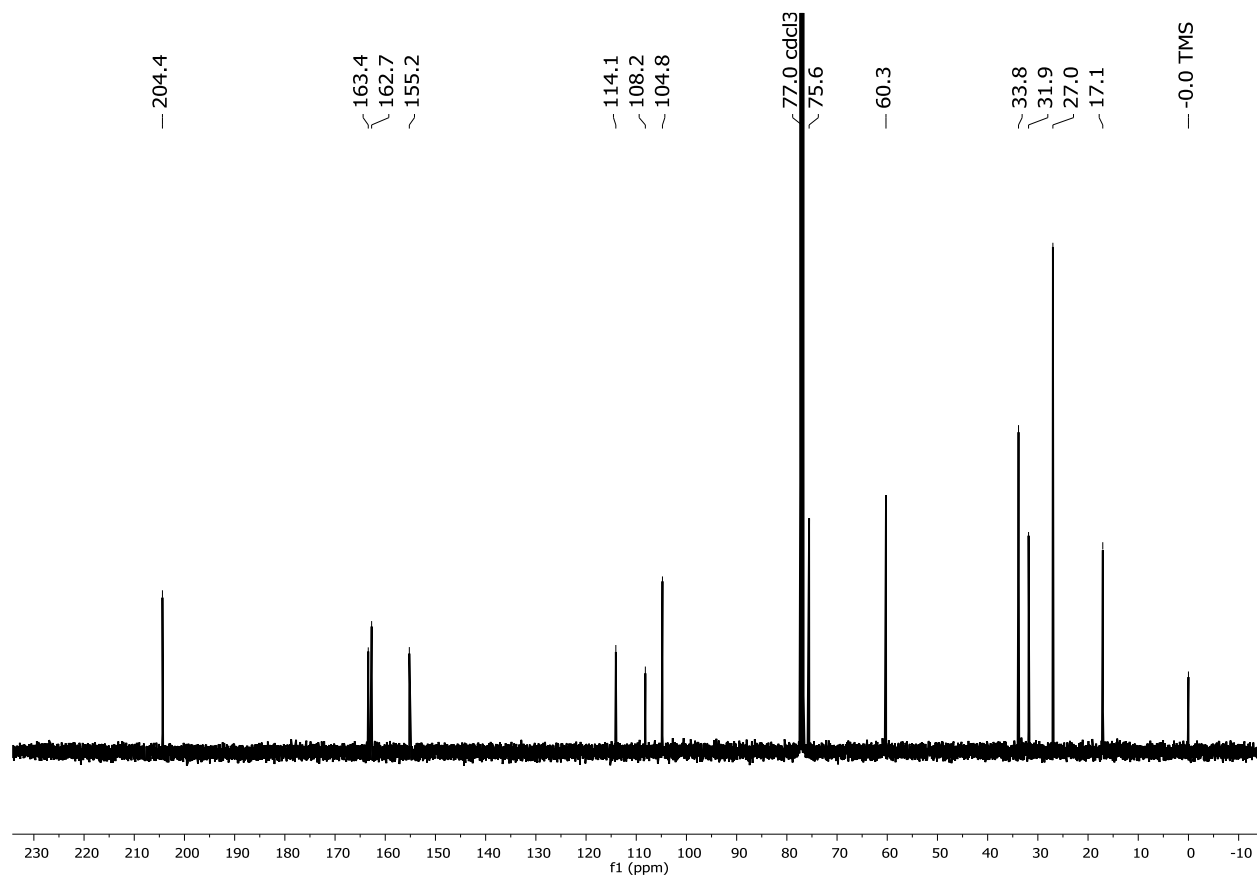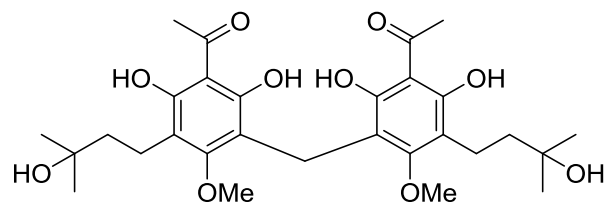

S10.  $^1\text{H}$  NMR of **8** ( $(\text{CD}_3)_2\text{SO}$ , 400 MHz)

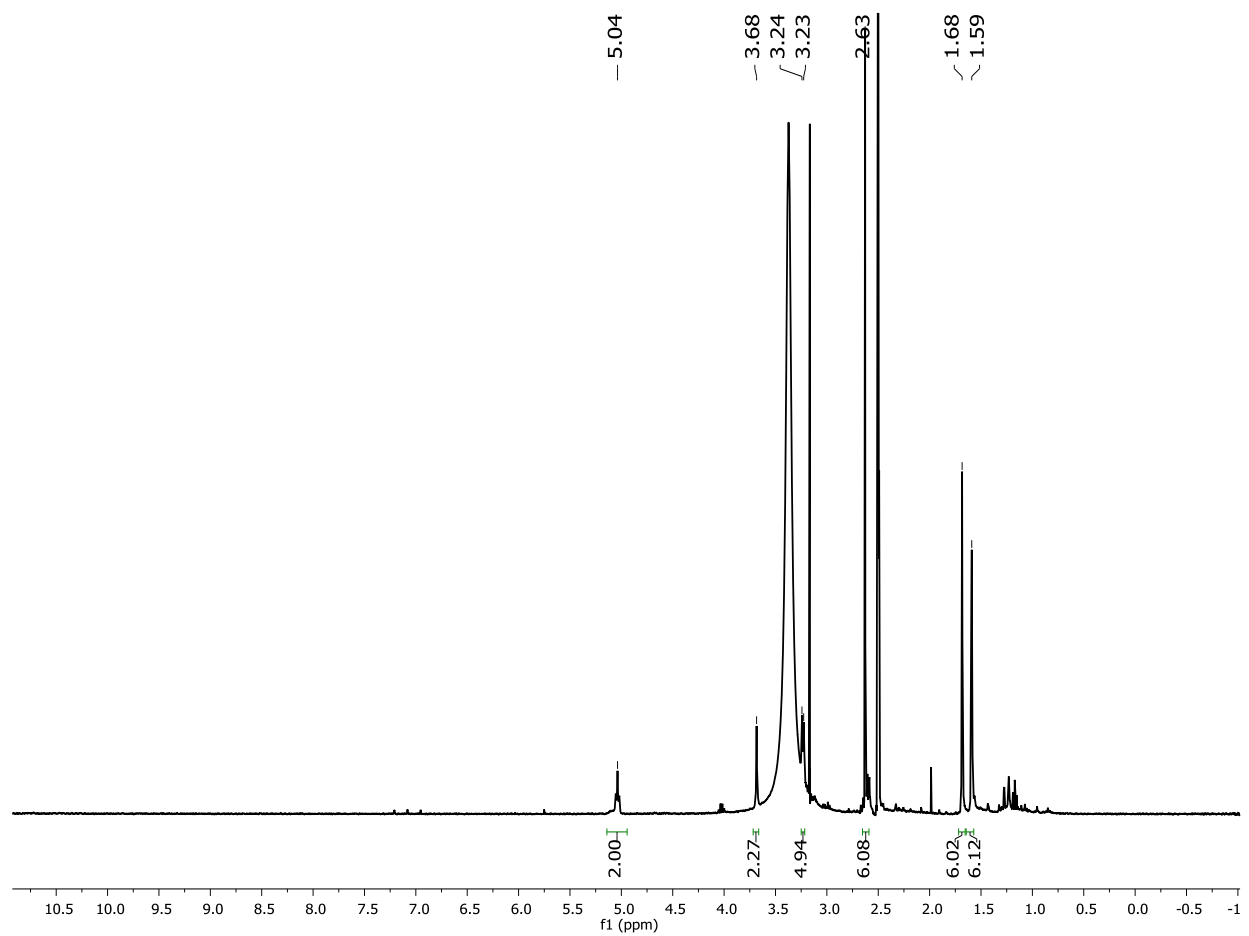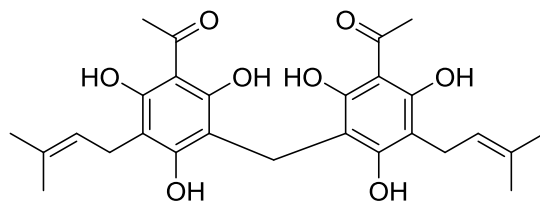

S11.  $^{13}\text{C}$  NMR of **8** ( $(\text{CD}_3)_2\text{SO}$ , 100 MHz)

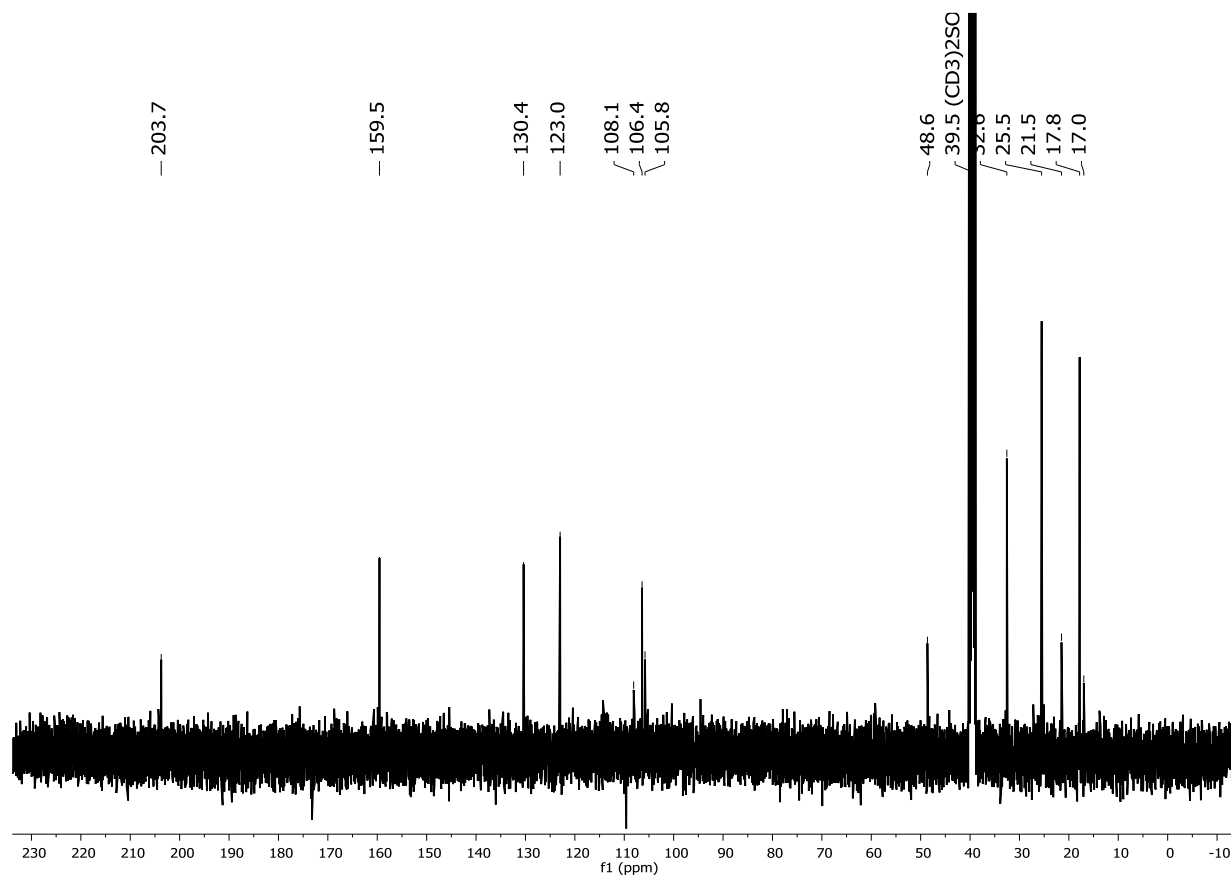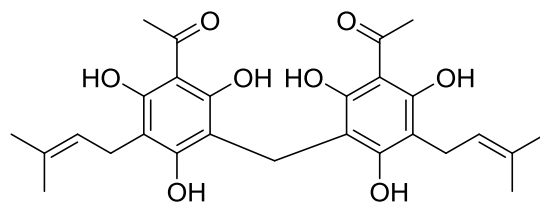

S12.  $^1\text{H}$  NMR of **9** ( $\text{CDCl}_3$ , 400 MHz)

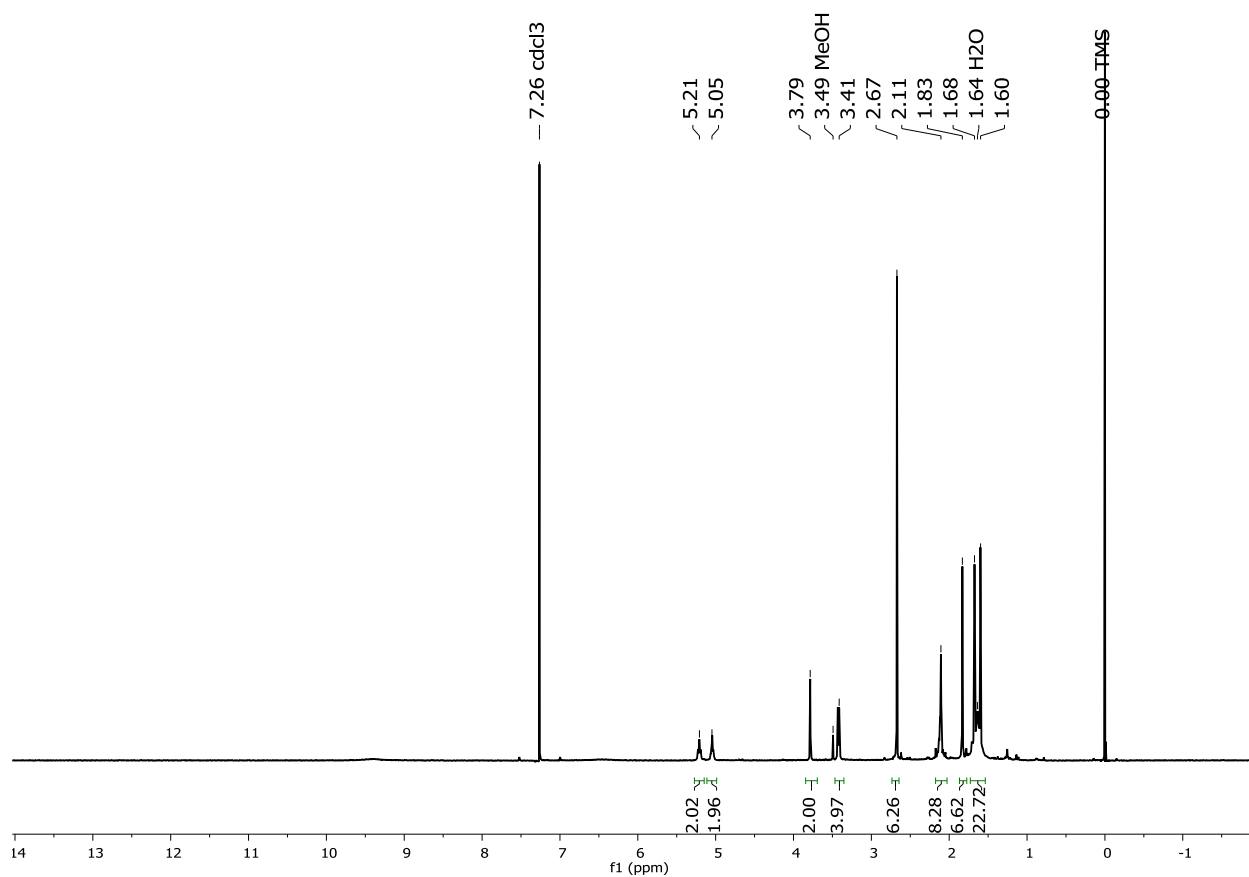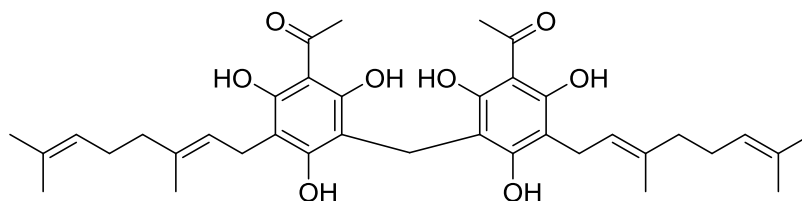

S13.  $^{13}\text{C}$  NMR of **9** ( $\text{CDCl}_3$ , 100 MHz)

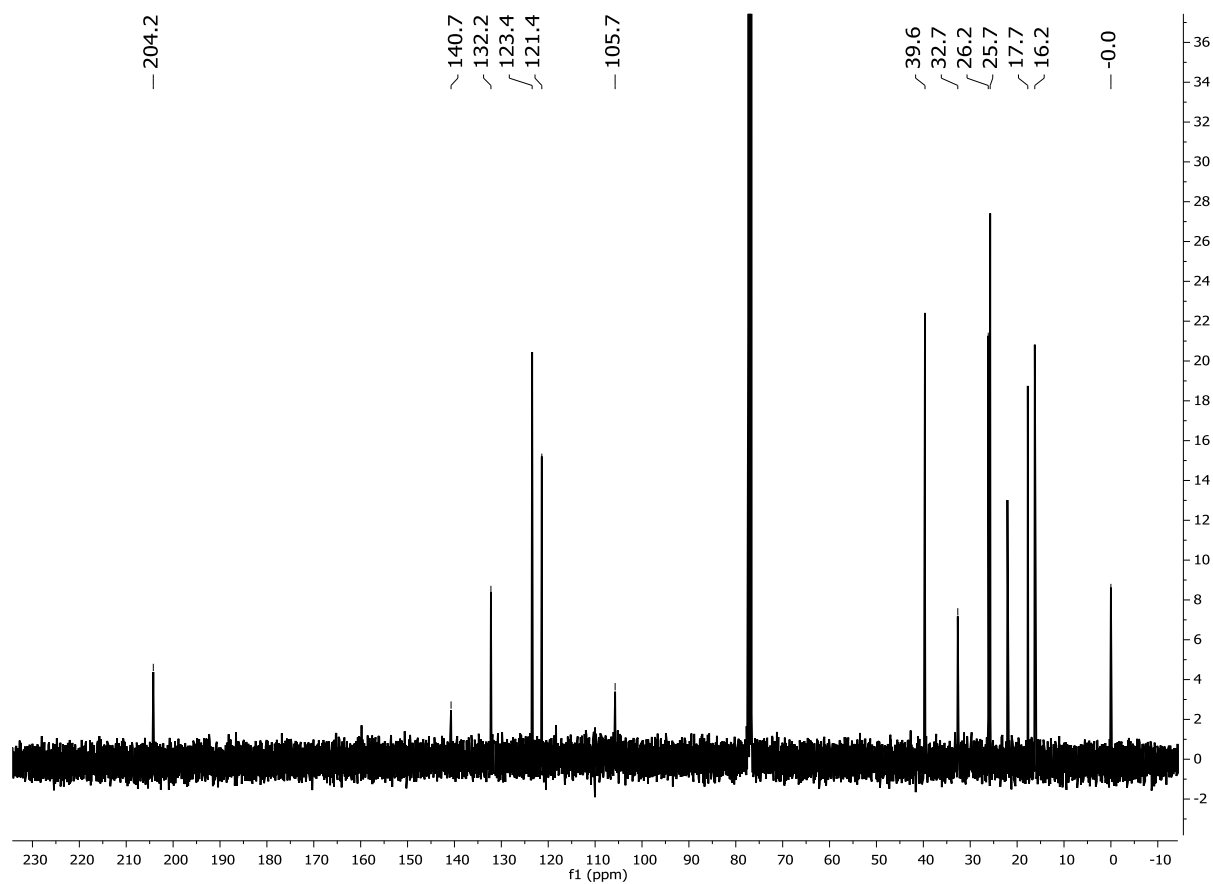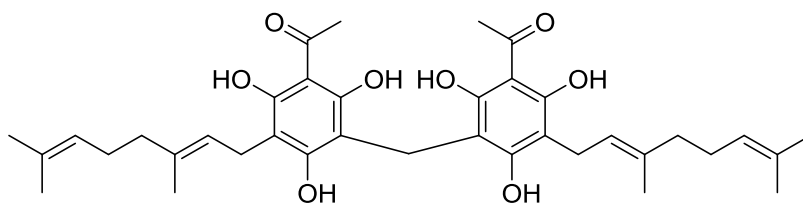

S14.  $^1\text{H}$  NMR of **11** ( $\text{CD}_3\text{OD}$ , 400 MHz)

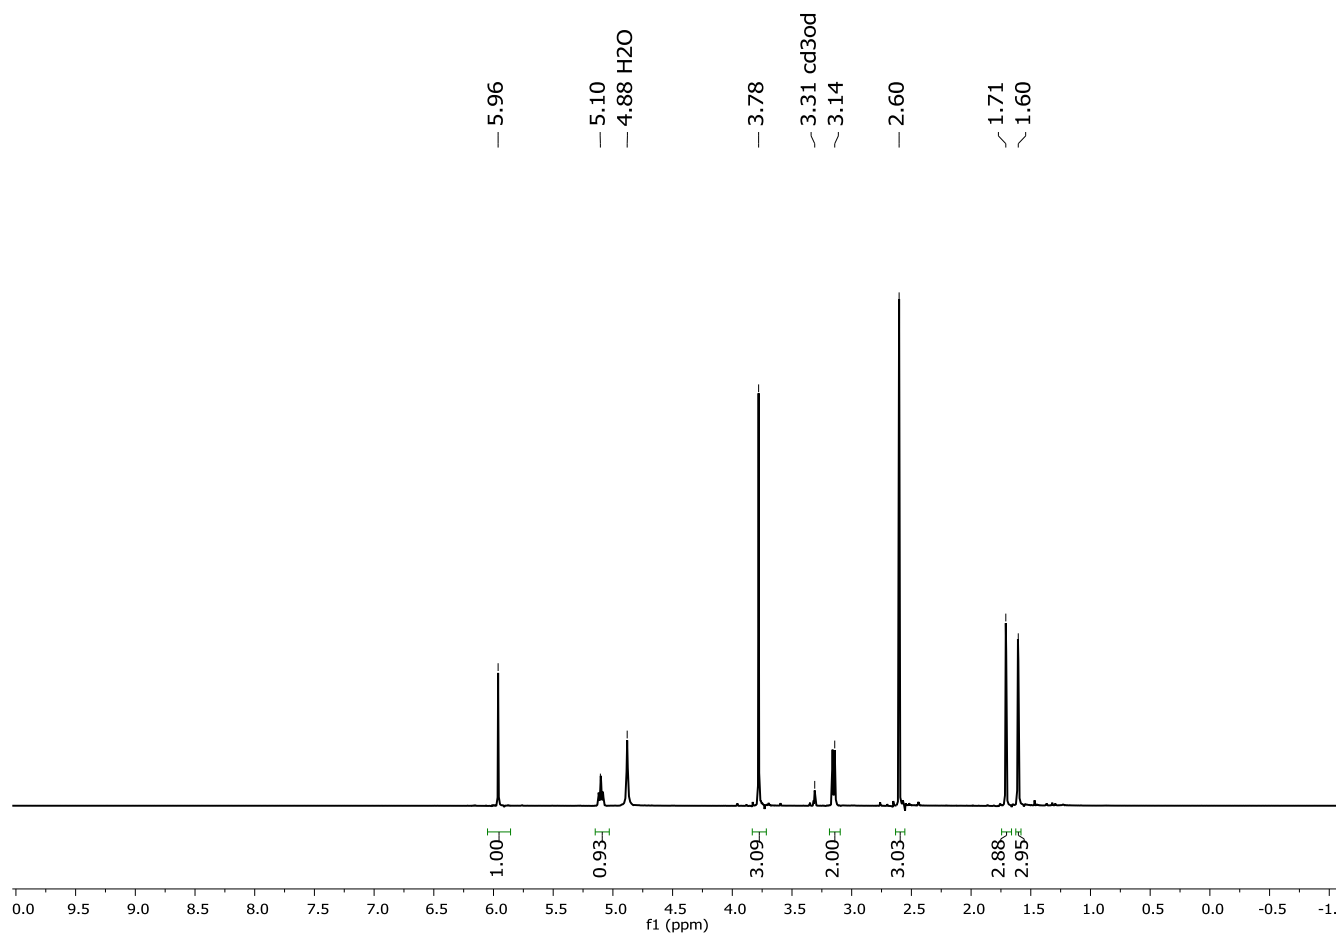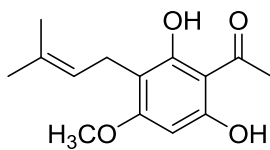

S15.  $^{13}\text{C}$  NMR of **11** ( $\text{CD}_3\text{OD}$ , 100 MHz)

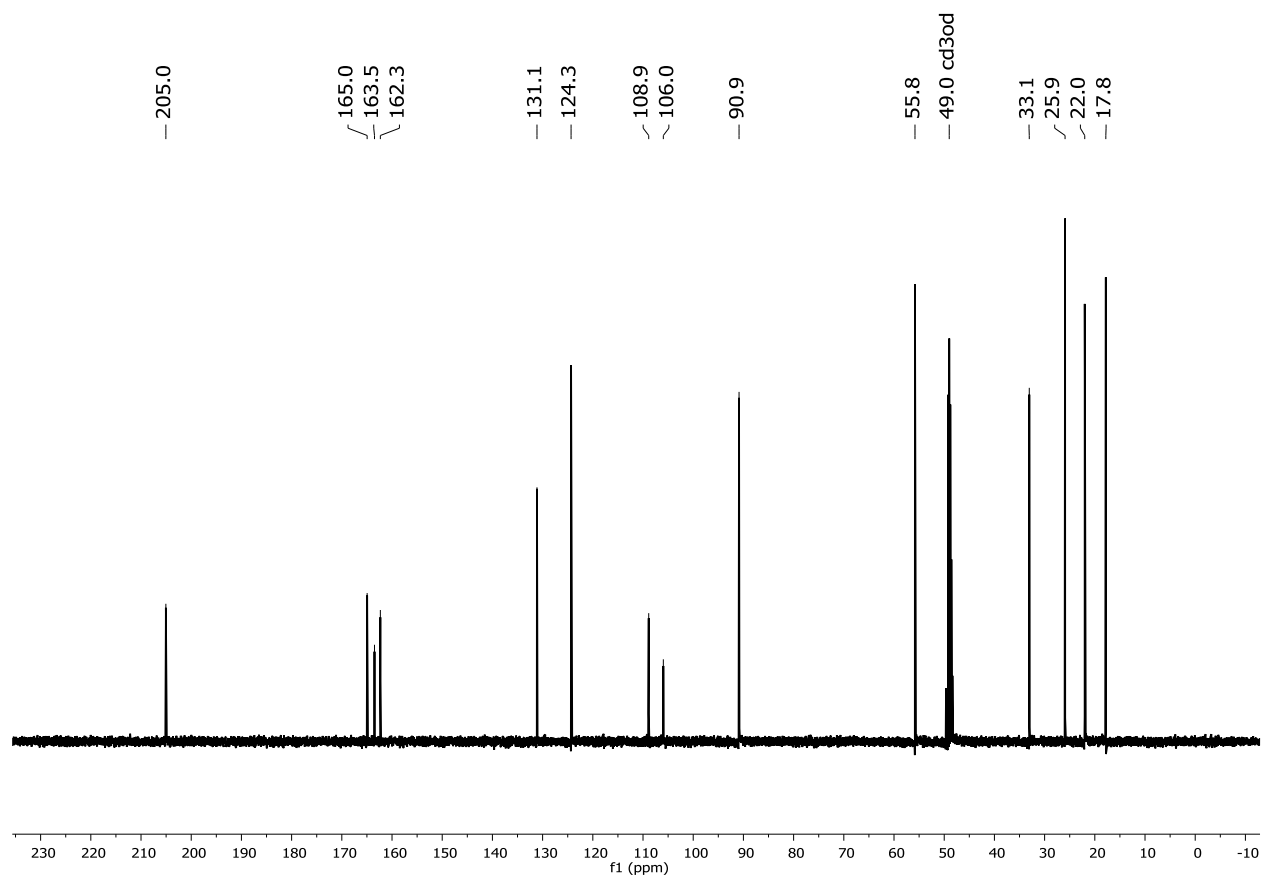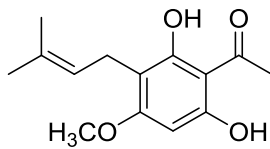

S16.  $^1\text{H}$  NMR of **12** ( $\text{CDCl}_3$ , 400 MHz)

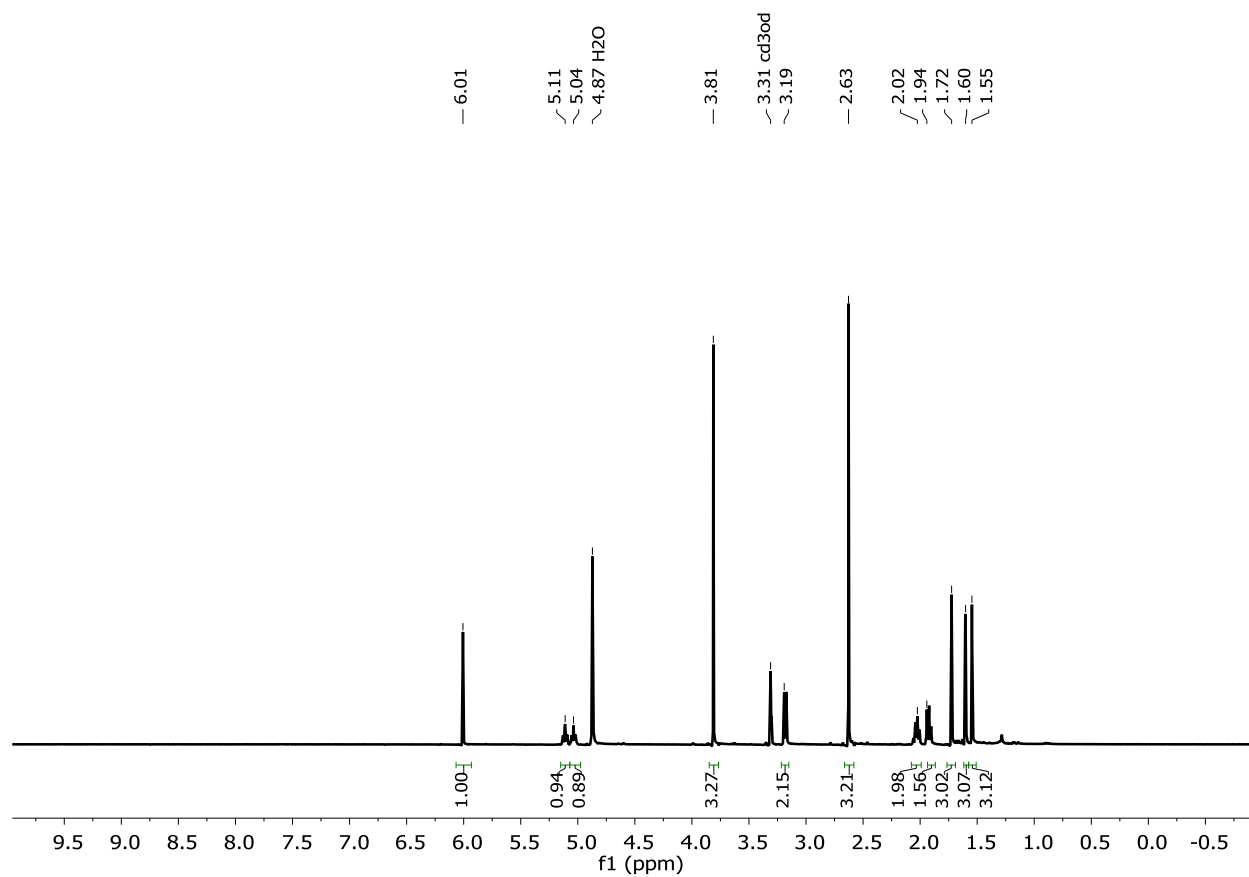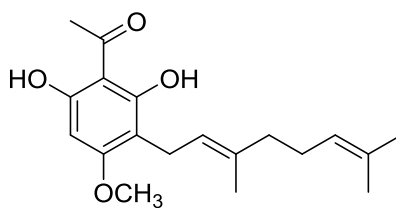



S17.  $^{13}\text{C}$  NMR of **12** ( $\text{CDCl}_3$ , 100 MHz)

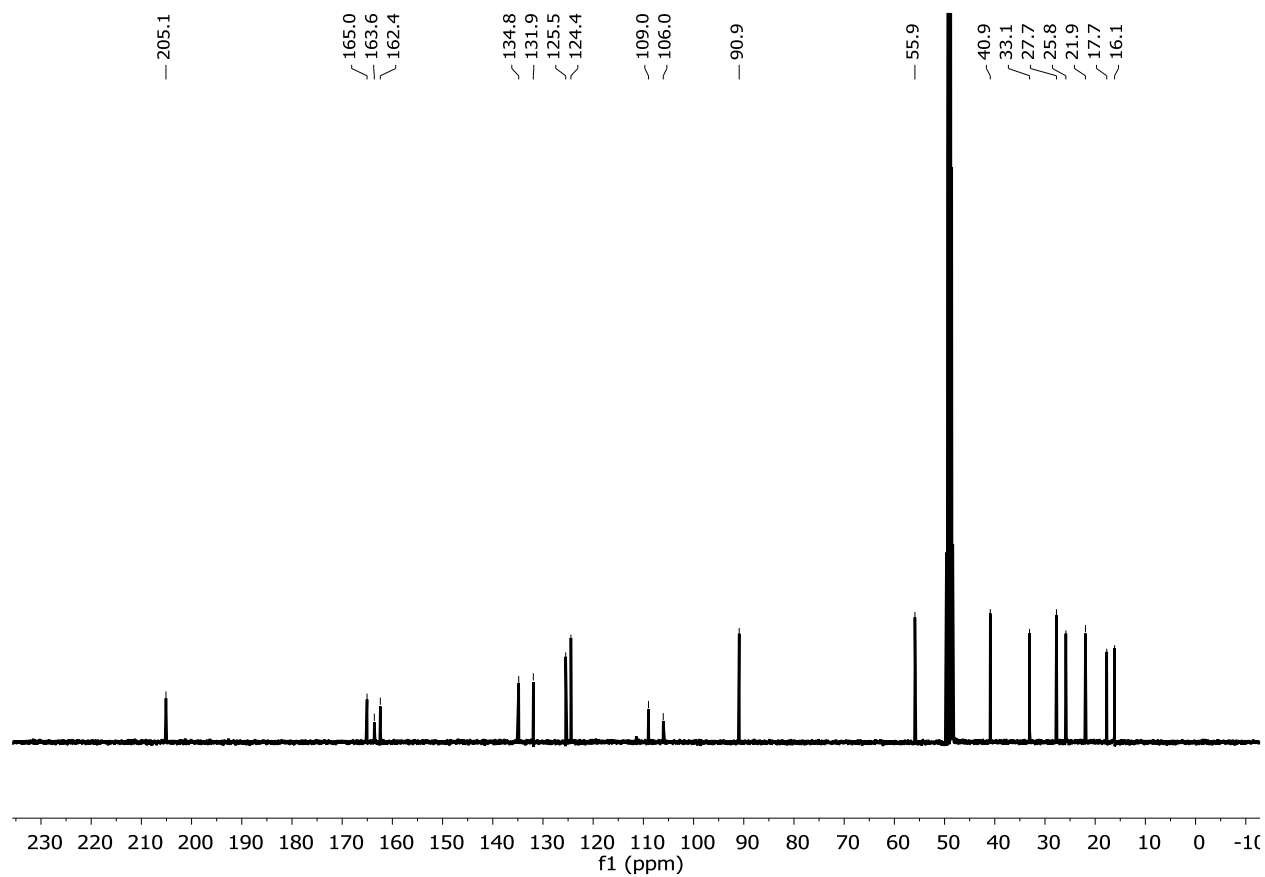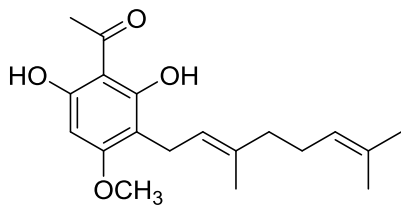

S18.  $^1\text{H}$  NMR of **13** ( $\text{CDCl}_3$ , 400 MHz)

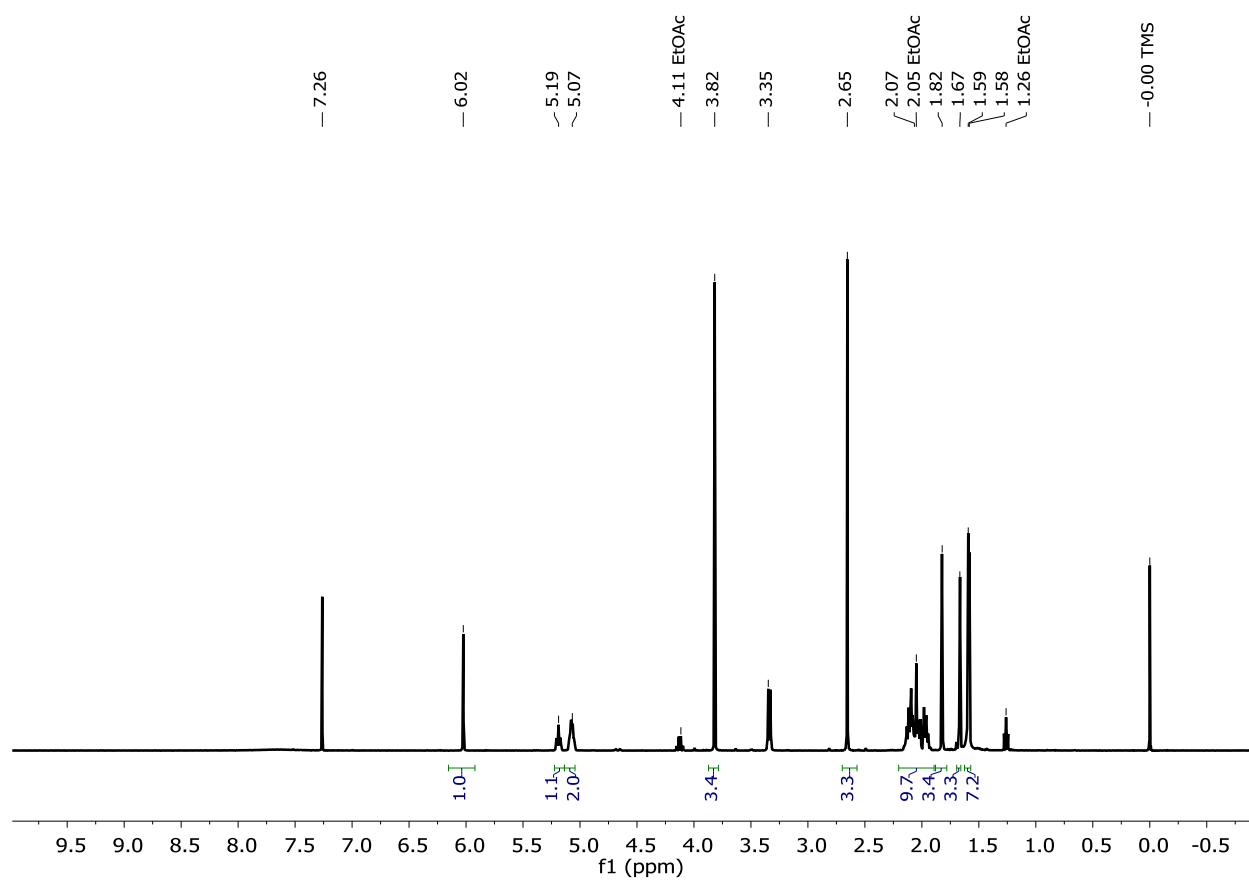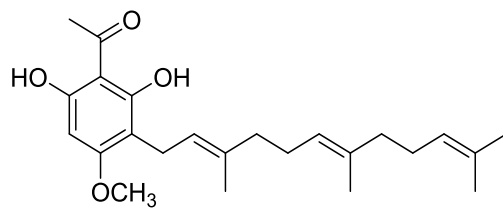

S19.  $^{13}\text{C}$  NMR of **13** ( $\text{CDCl}_3$ , 100 MHz)

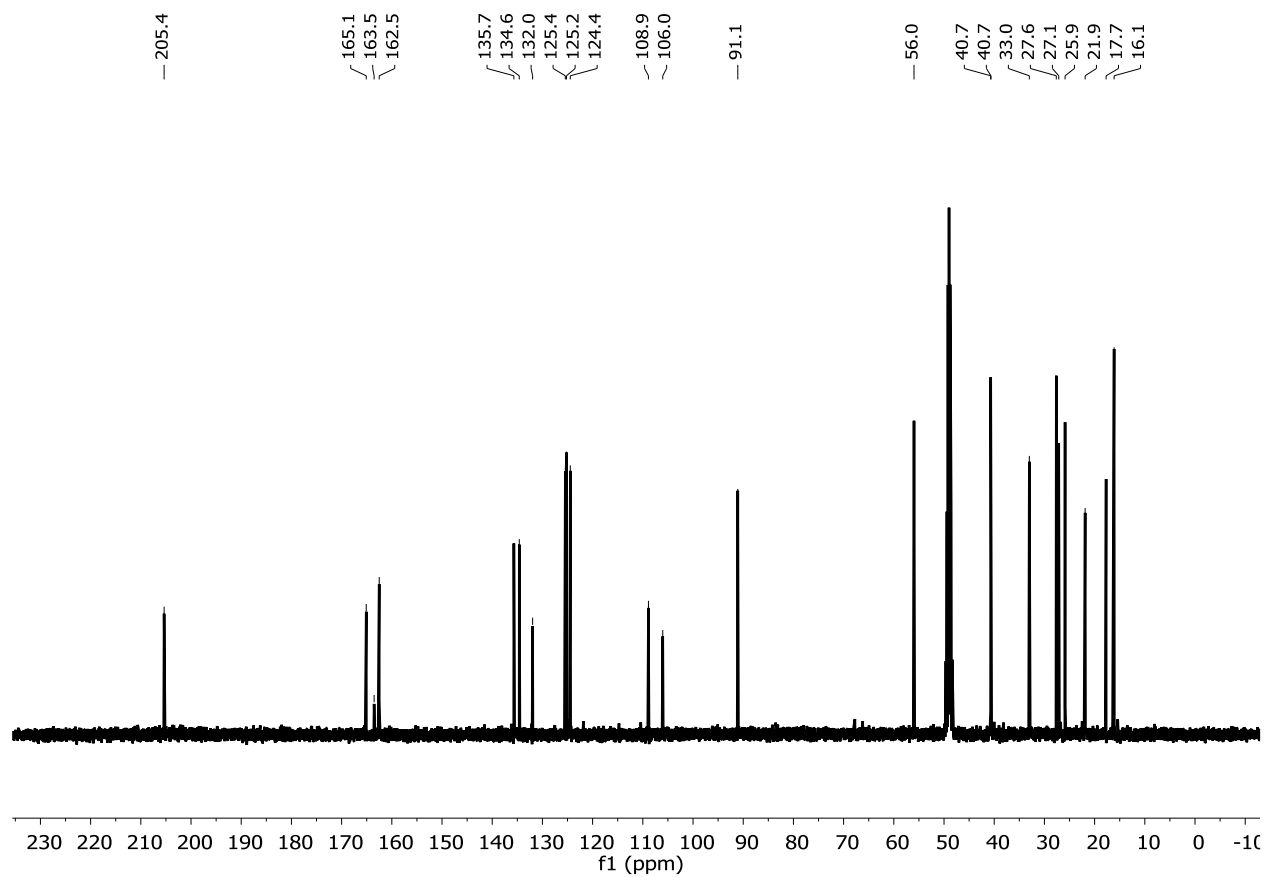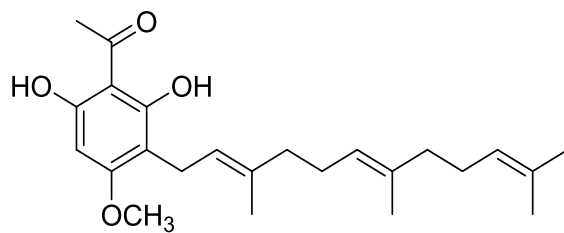

S20.  $^1\text{H}$  NMR of **14** ( $\text{CD}_3\text{OD}$ , 400 MHz)

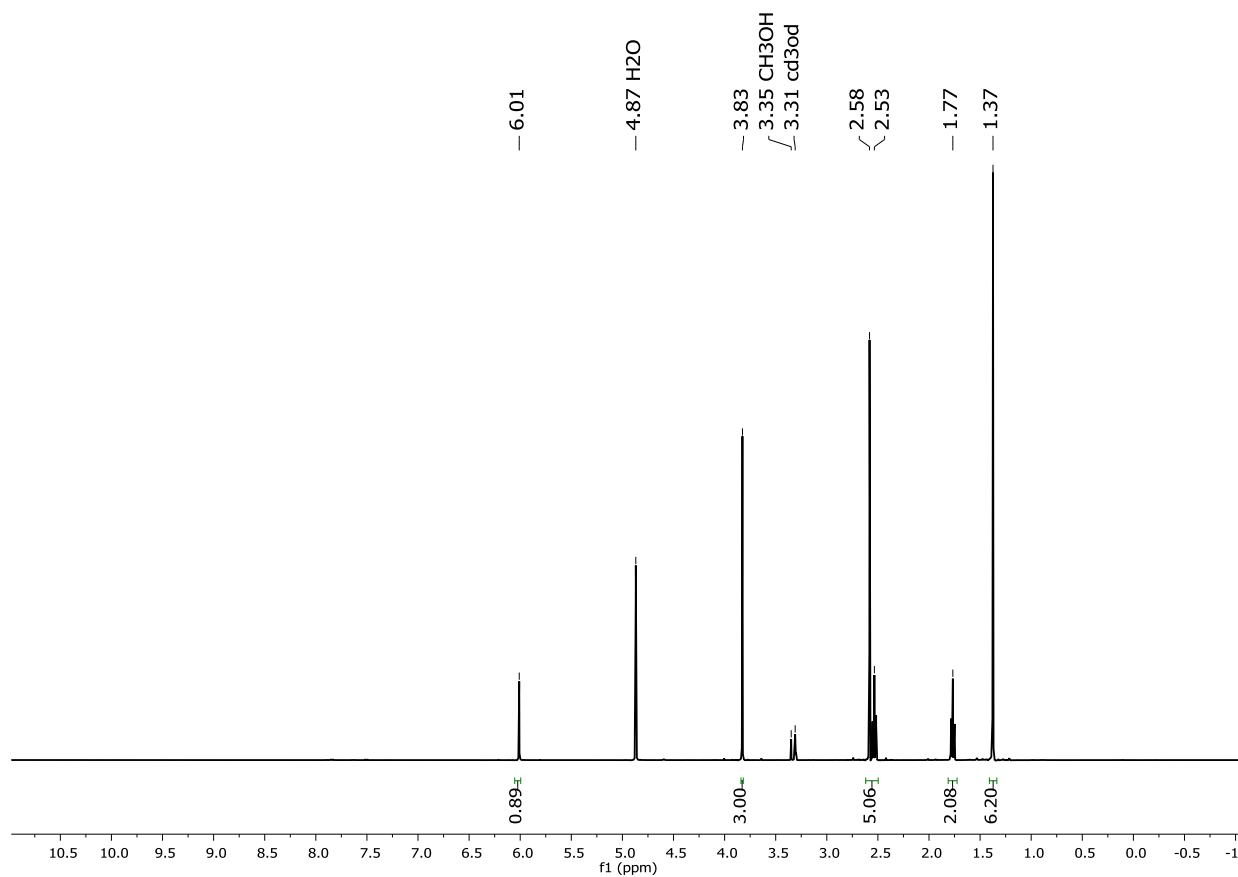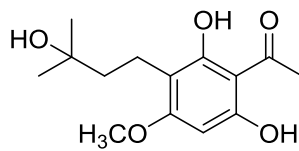

S21.  $^{13}\text{C}$  NMR of **14** ( $\text{CD}_3\text{OD}$ , 100 MHz)

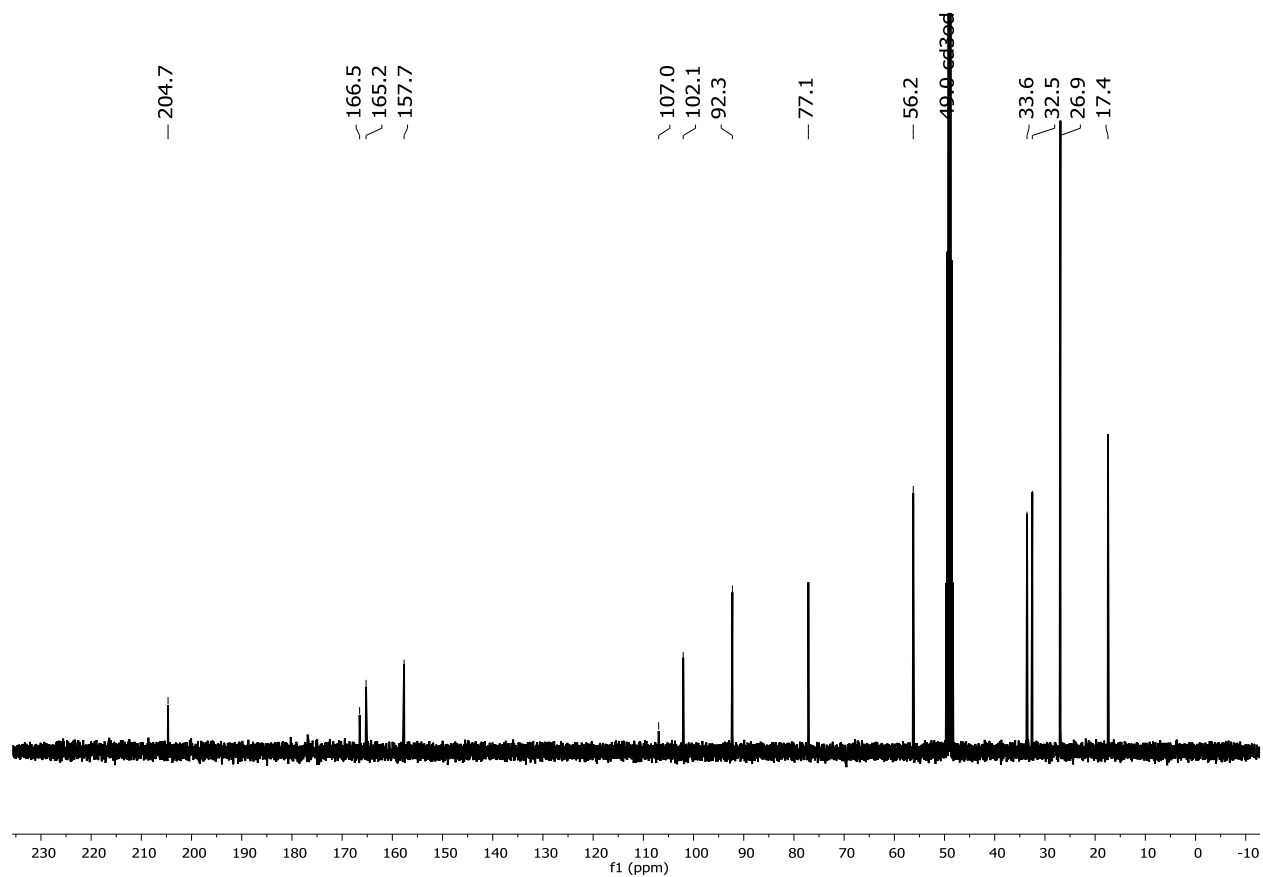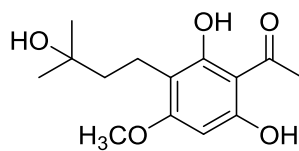

S22.  $^1\text{H}$  NMR of **16** ( $\text{CD}_3\text{OD}$ , 400 MHz)

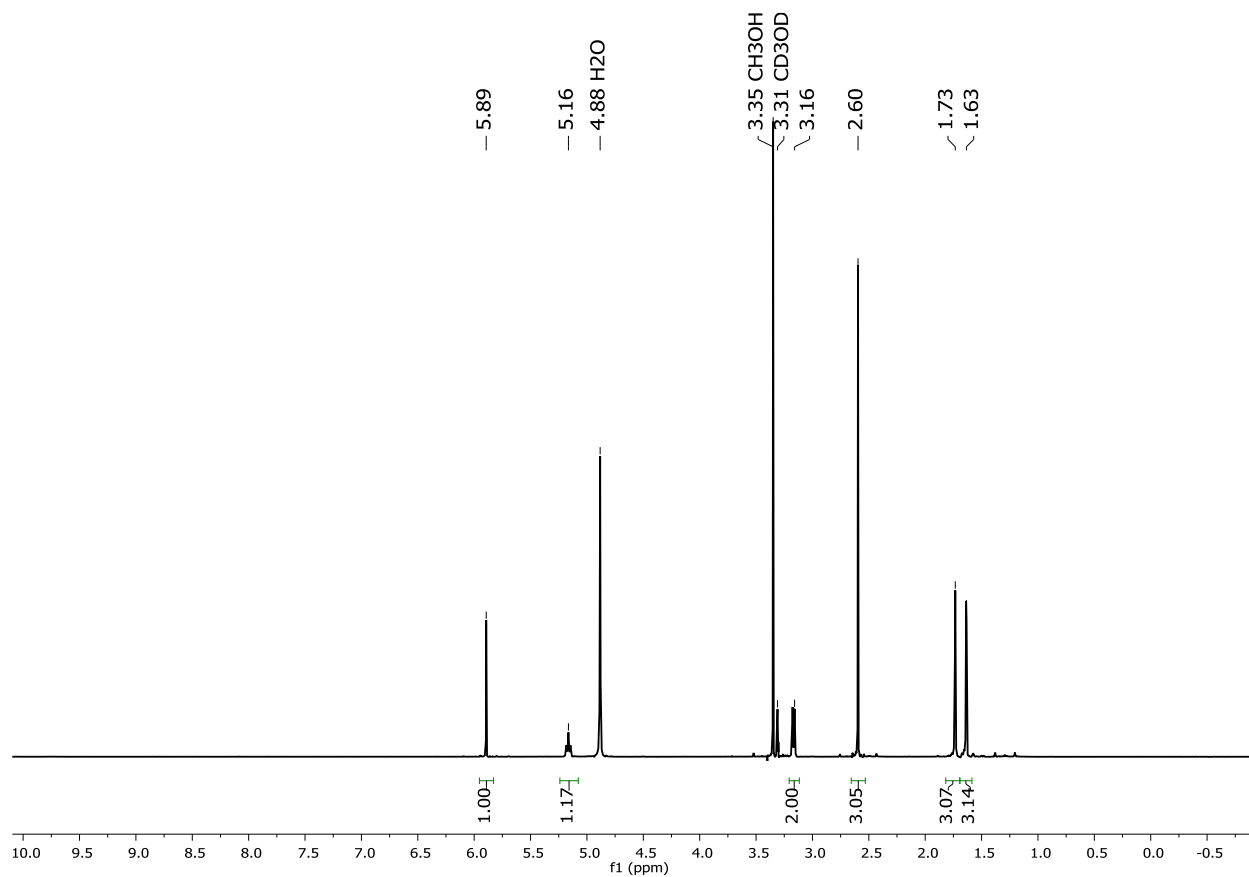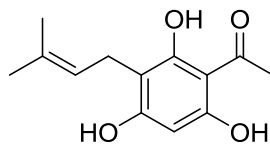

S23.  $^{13}\text{C}$  NMR of **16** ( $\text{CD}_3\text{OD}$ , 100 MHz)

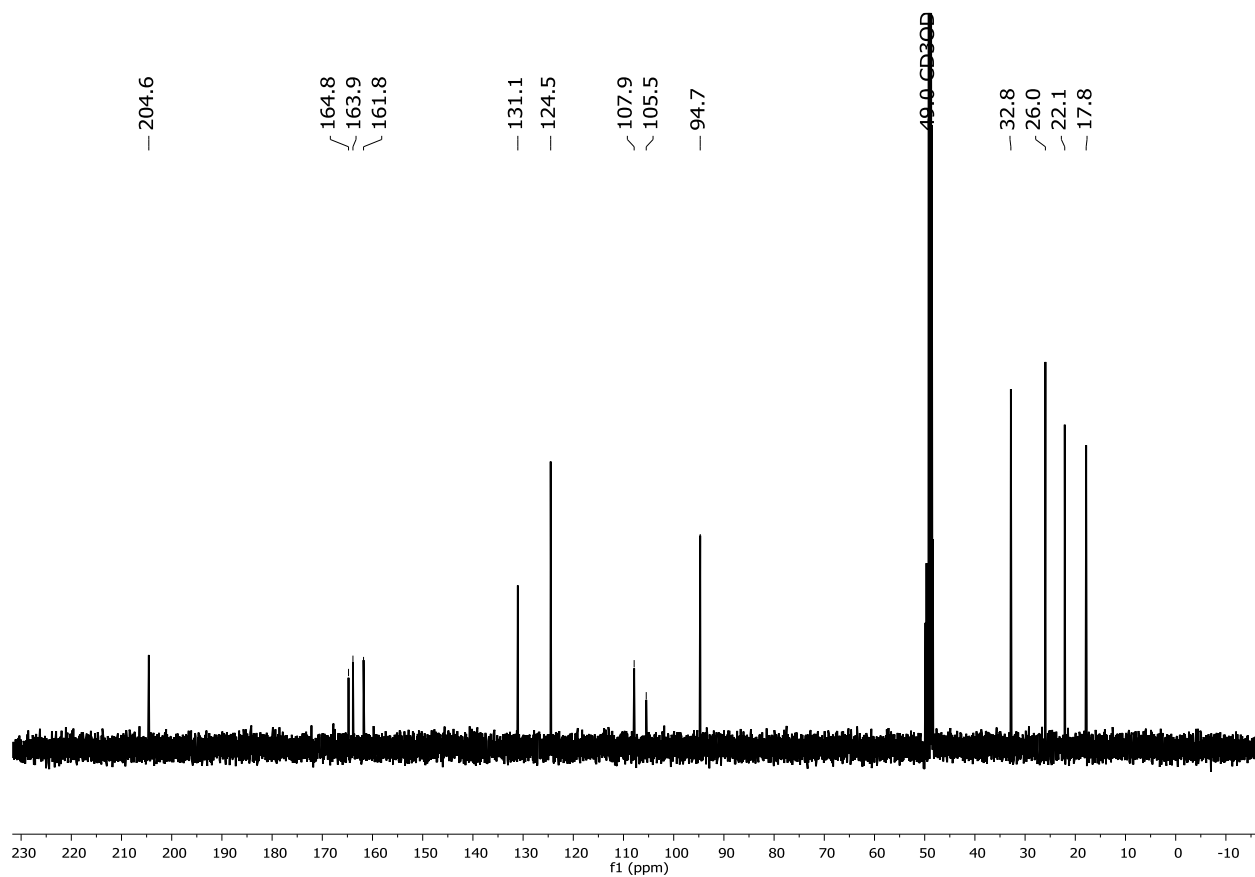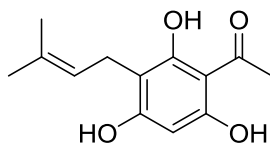

S24.  $^1\text{H}$  NMR of **17** ( $\text{CDCl}_3$ , 400 MHz)

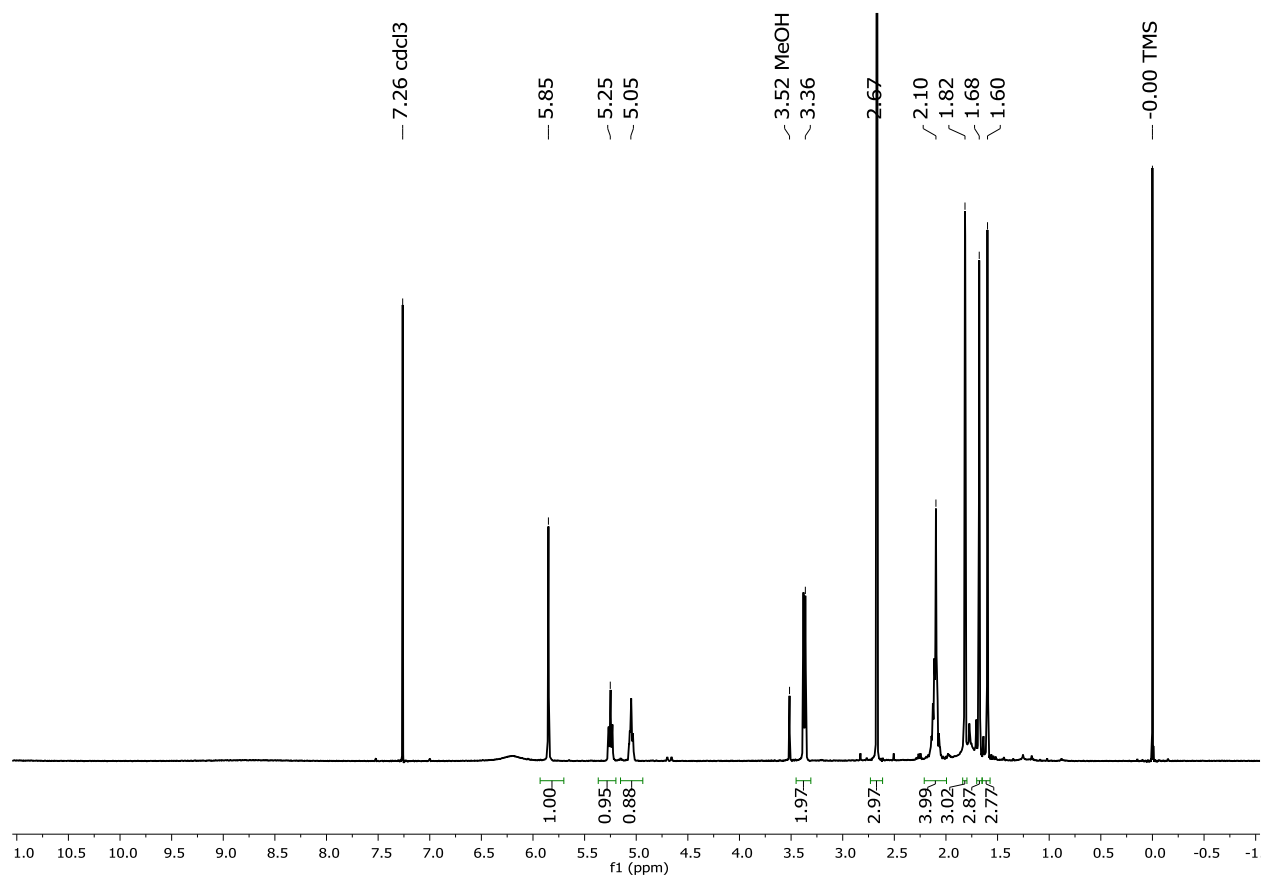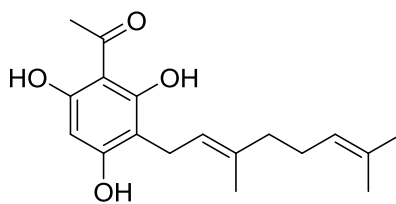



S25. <sup>1</sup>H NMR of **17** (CD<sub>3</sub>OD, 400 MHz)

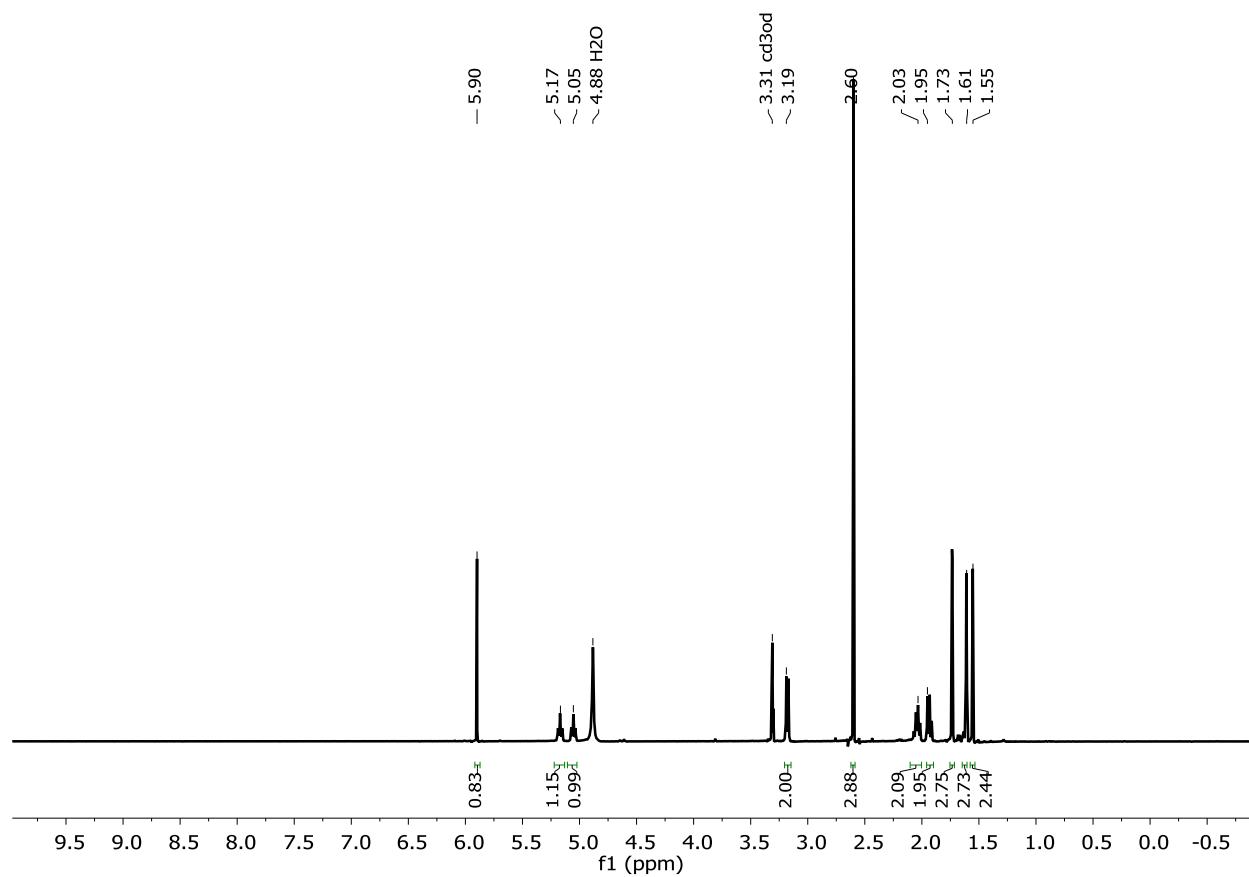

S26.  $^{13}\text{C}$  NMR of **17** ( $\text{CD}_3\text{OD}$ , 100 MHz)

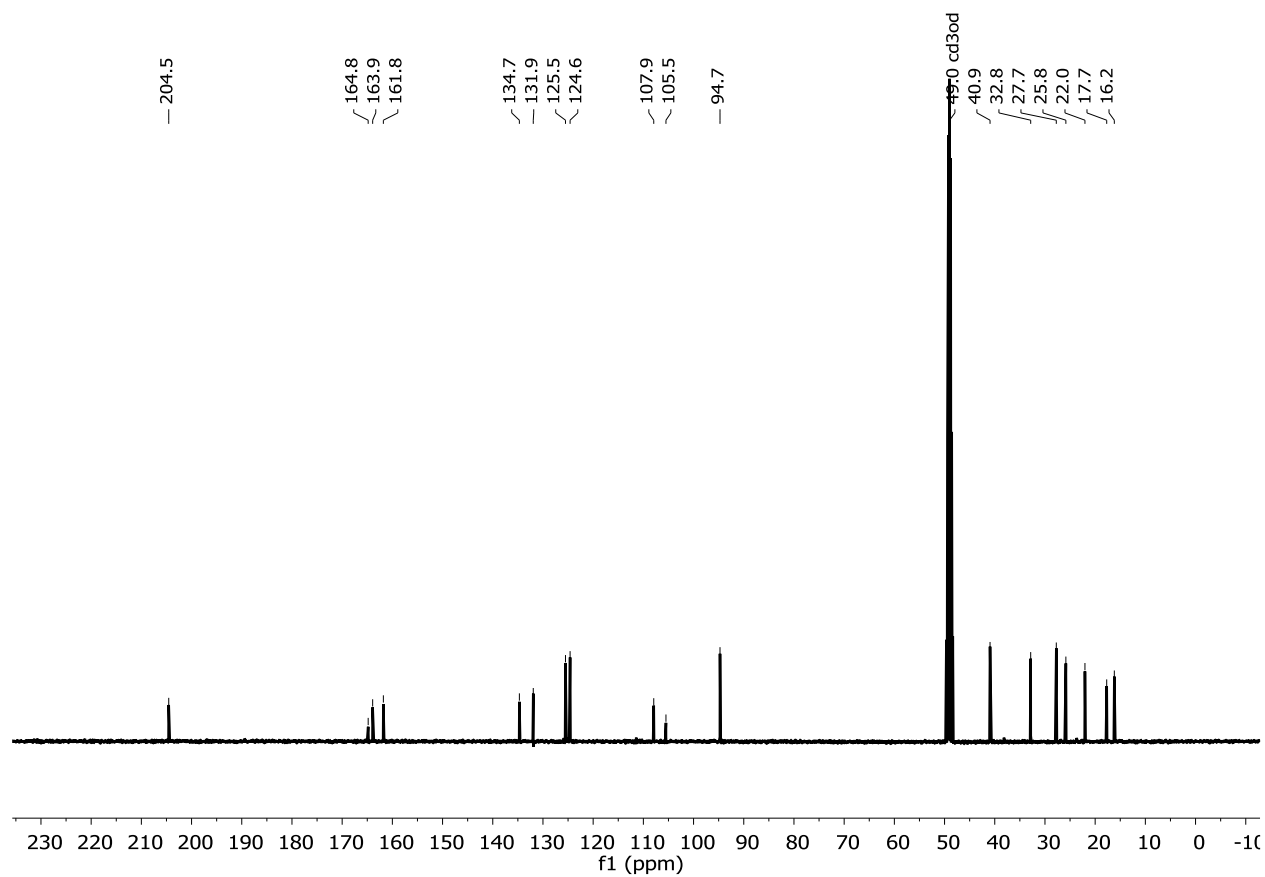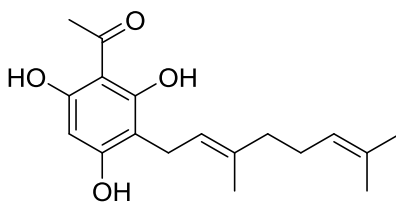

S27.  $^1\text{H}$  NMR of **18** ( $\text{CD}_3\text{OD}$ , 400 MHz)

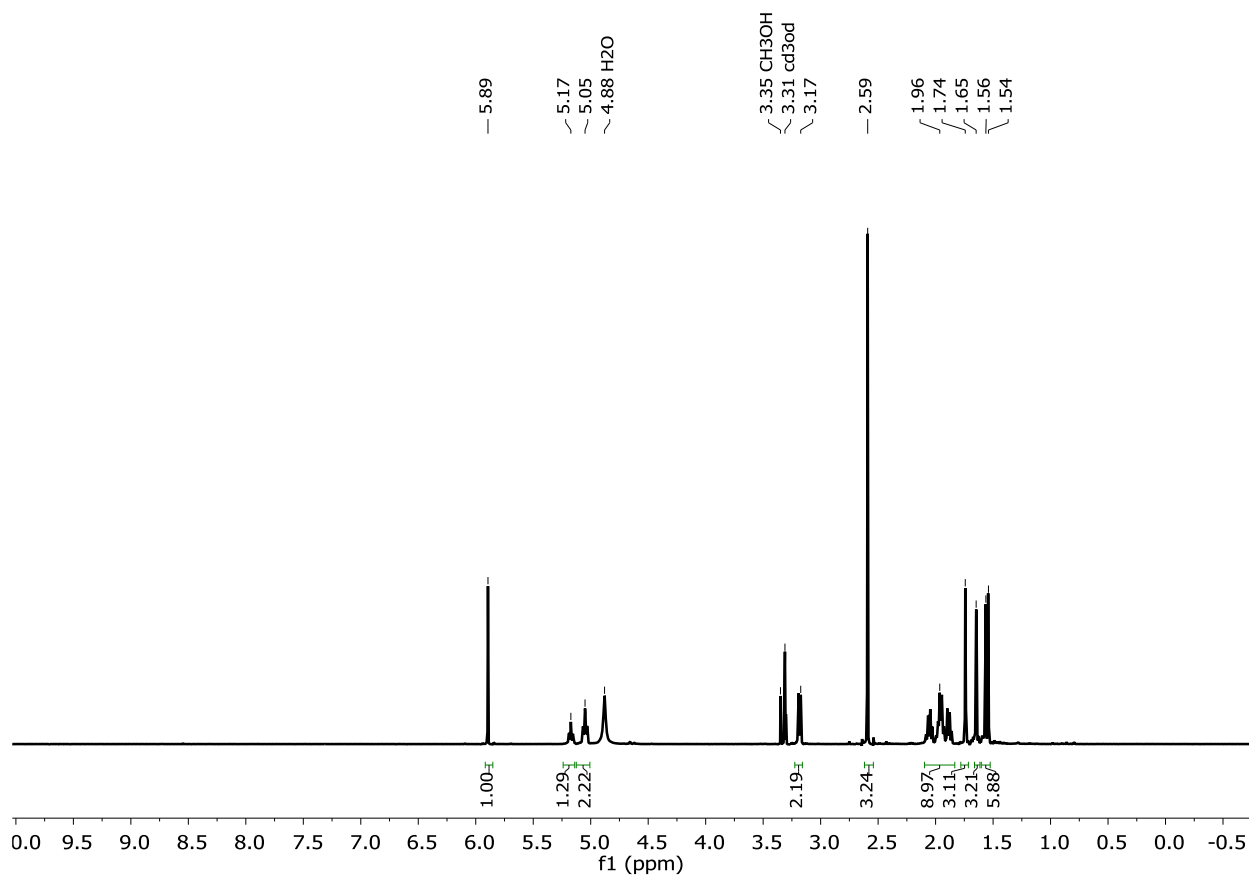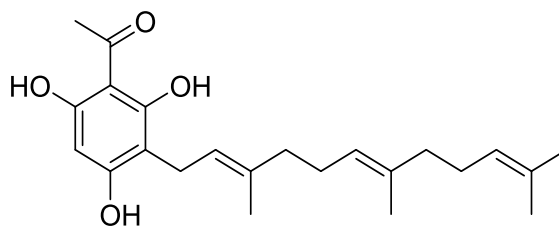

S28.  $^{13}\text{C}$  NMR of **18** ( $\text{CD}_3\text{OD}$ , 100 MHz)

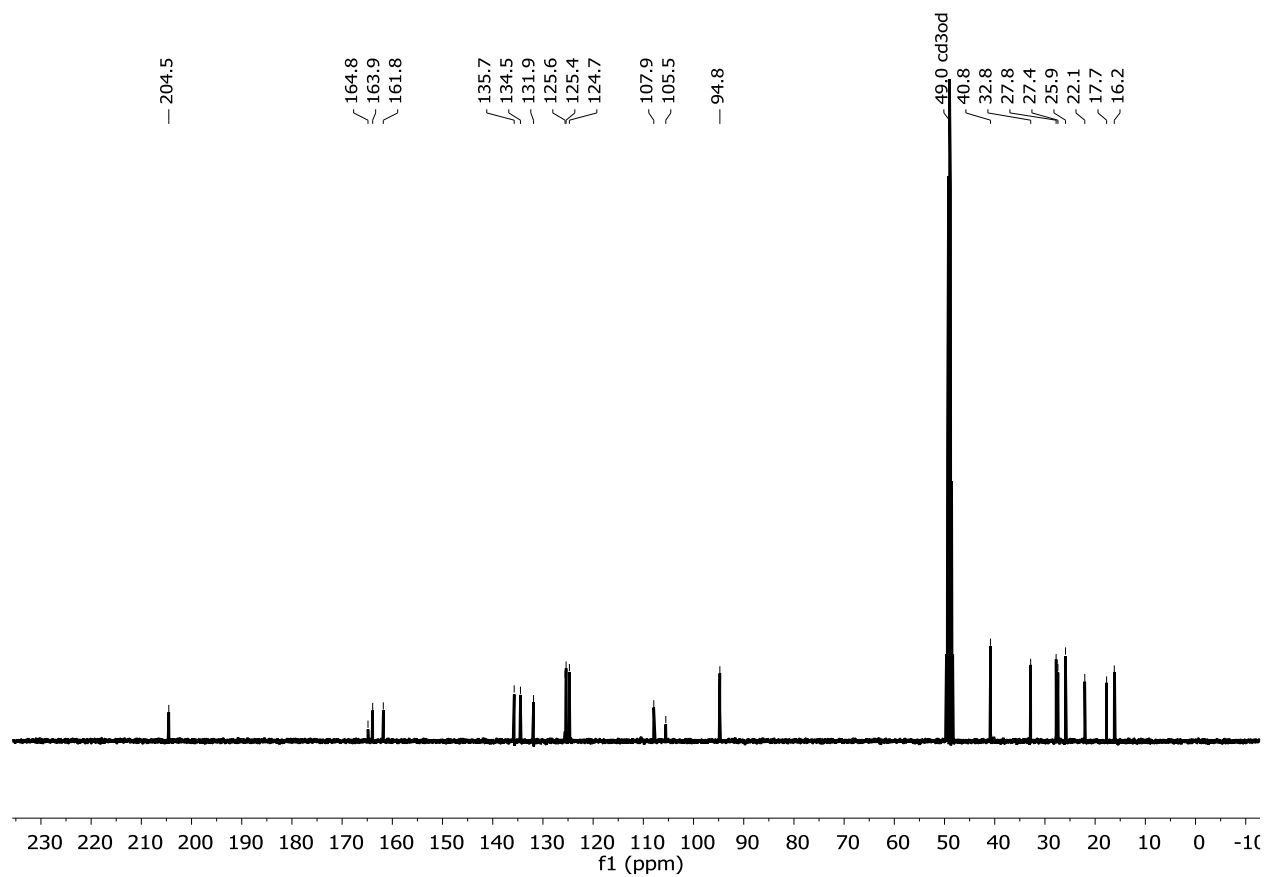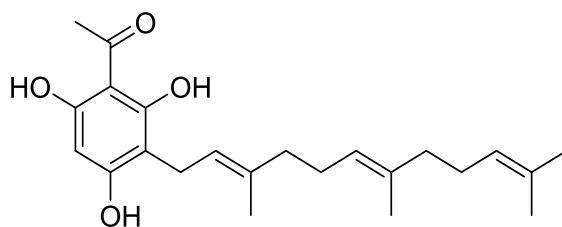

S29.  $^1\text{H}$  NMR of **19** ( $\text{CDCl}_3$ , 500 MHz)

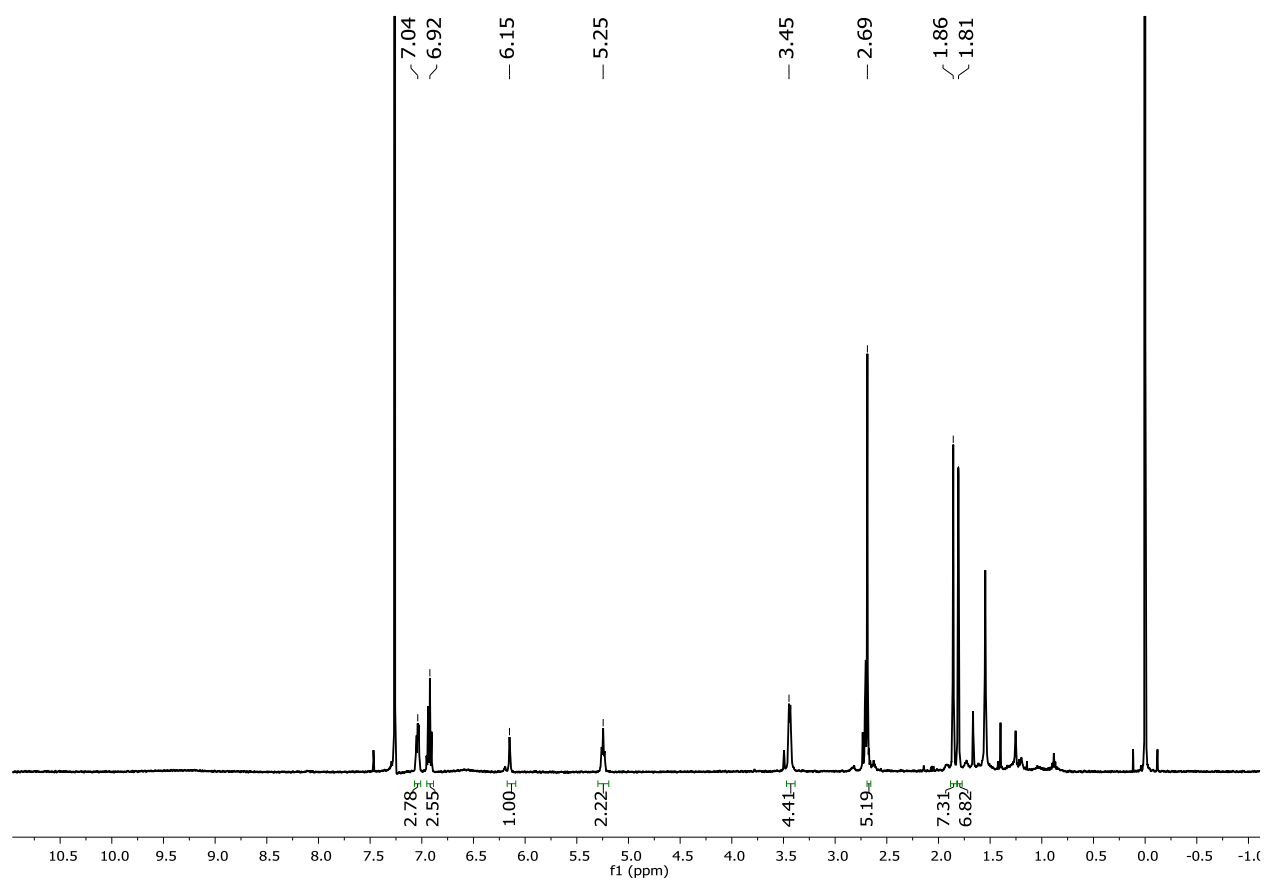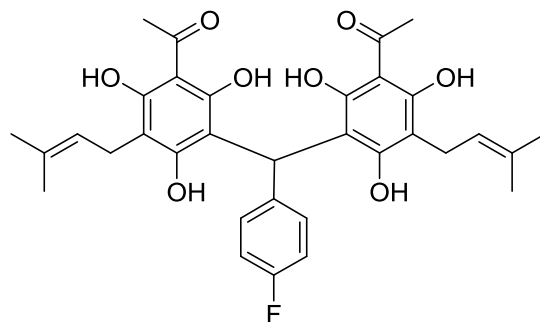

## S30. HPLC of **11**

Column: Phenomenex Luna C<sub>18</sub>, 250 x 4.6 mm

Concentration: 2.5 mg/mL

Injection: 10  $\mu$ L injection

Mobile Phase: 80% MeOH (aq.)

Detector: PDA

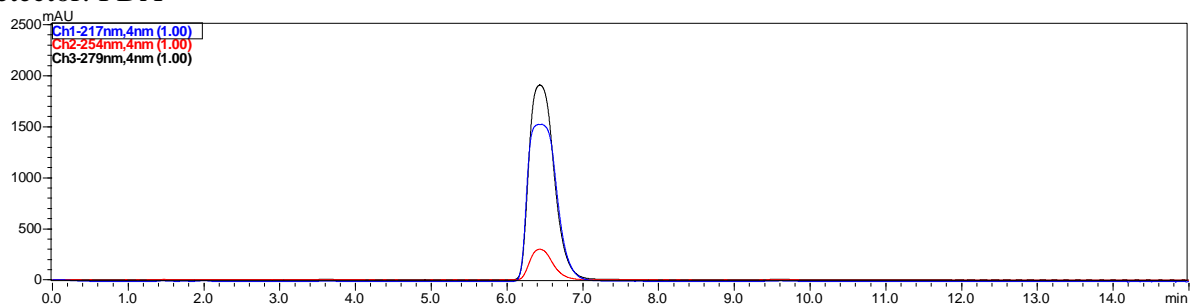

Detector: ELSD

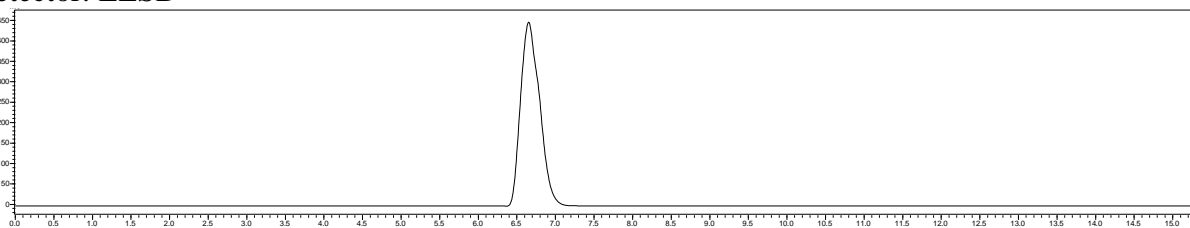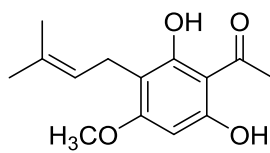

### S31. HPLC of 12

Column: Phenomenex Luna C<sub>18</sub>, 250 x 4.6 mm

Concentration: 2.5 mg/mL

Injection: 10  $\mu$ L injection

Mobile Phase: 88% MeOH (aq.)

Detector: PDA

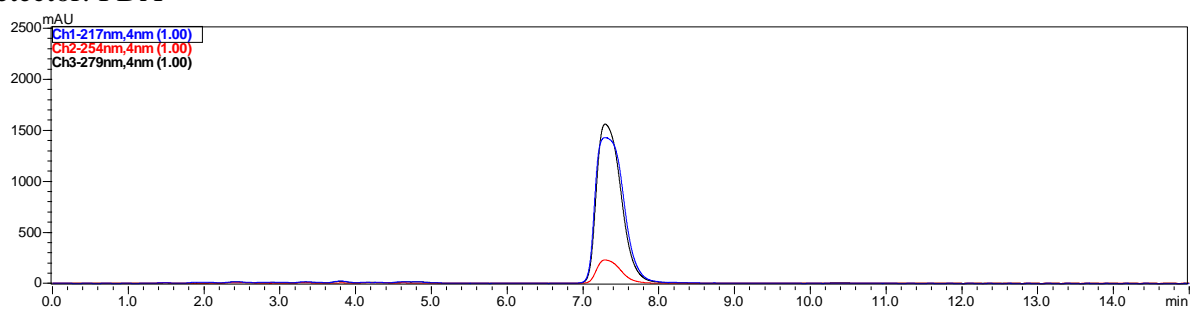

Detector: ELSD

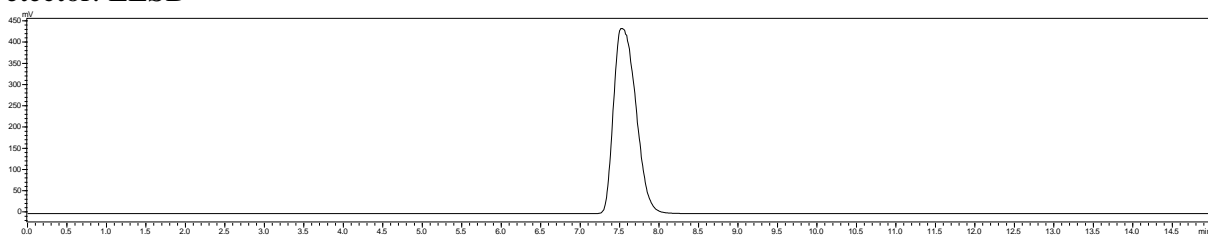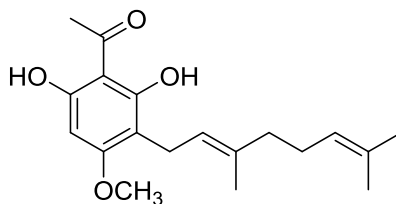

### S32. HPLC of 13

Column: Phenomenex Luna C<sub>18</sub>, 250 x 4.6 mm

Concentration: 2.5 mg/mL

Injection: 10  $\mu$ L injection

Mobile Phase: 93% MeOH (aq.)

Datafile Name: ae-231-205-10 c18 analytical phen01.lcd  
Sample Name: ae-231-205-10  
Sample ID: ae-231-205-10

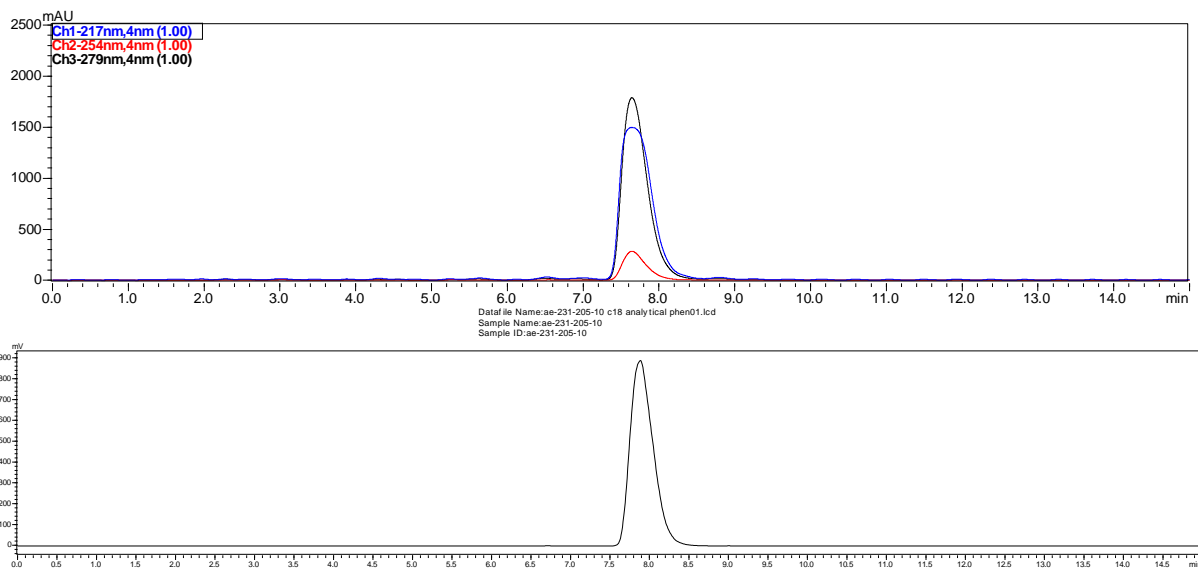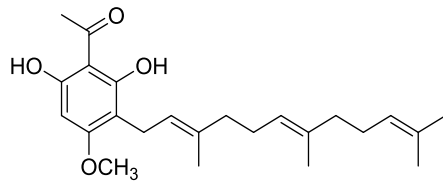



### S33. HPLC of **16**

Column: Phenomenex Luna C<sub>18</sub>, 250 x 4.6 mm

Concentration: 1.25 mg/mL

Injection: 10  $\mu$ L injection

Mobile Phase: 100% MeOH (aq.)

Detector: PDA

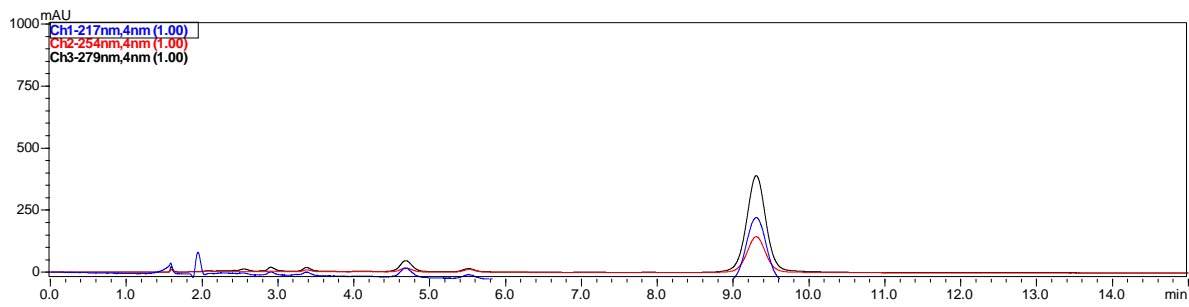

Detector: ELSD

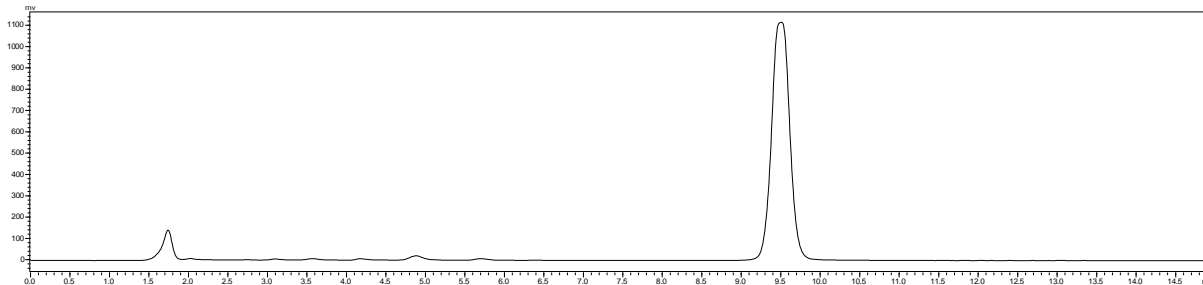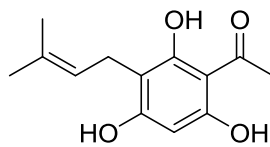

### S34. HPLC of 17

Column: Phenomenex Luna C<sub>18</sub>, 250 x 4.6 mm

Concentration: 5 mg/mL

Injection: 5  $\mu$ L injection

Mobile Phase: 85% MeOH (aq.)

Detector: PDA

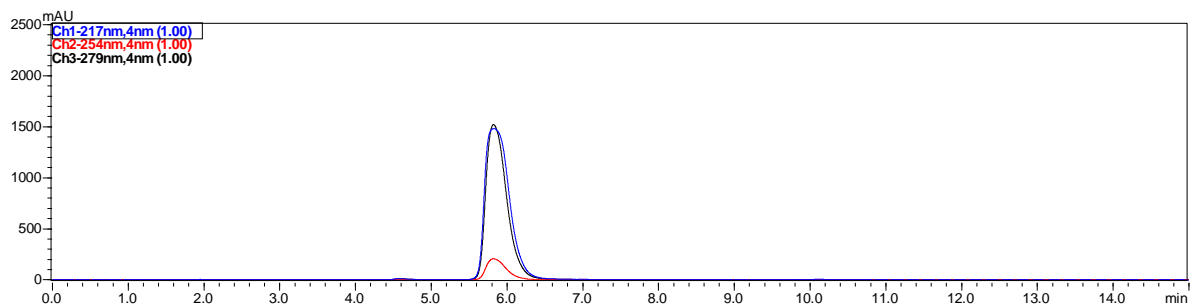

Detector: ELSD

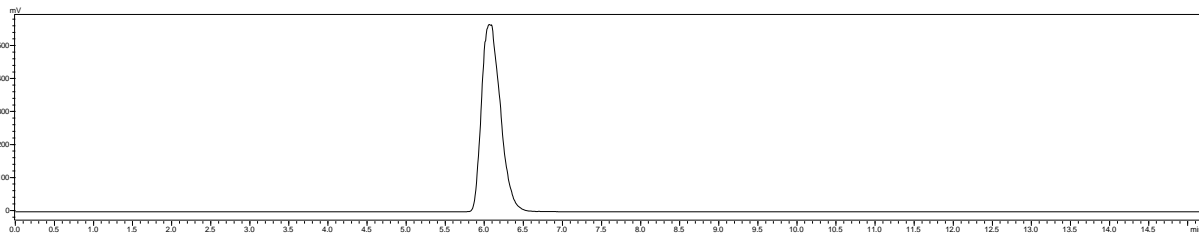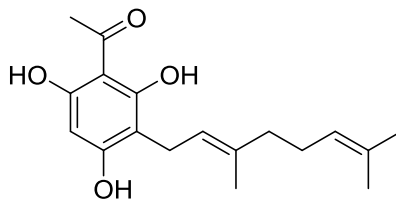

### S35. HPLC of **18**

2.5 mg/mL; 10  $\mu$ L; 90% MeOH Isocratic 250 x 4.6 Phenomenex Luna C18

Column: Phenomenex Luna C<sub>18</sub>, 250 x 4.6 mm

Concentration: 2.5 mg/mL

Injection: 10  $\mu$ L injection

Mobile Phase: 90% MeOH (aq.)

Datafile Name:ae-231-205-11 c18 analytical phen02.lcd

Sample Name:ae-231-205-11

Sample ID:ae-231-205-11

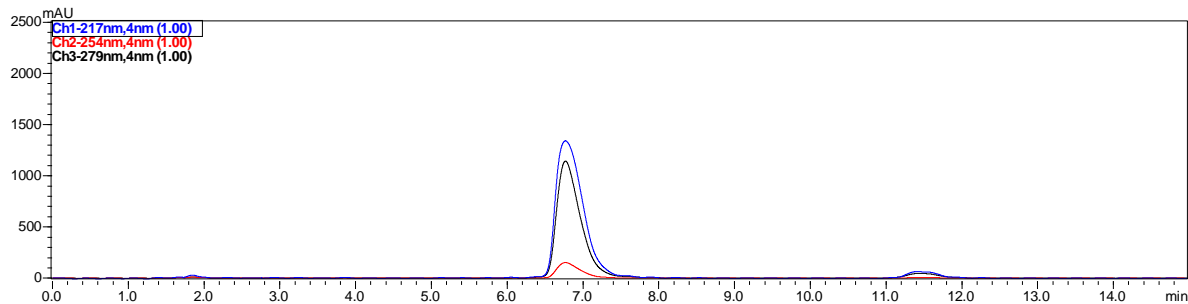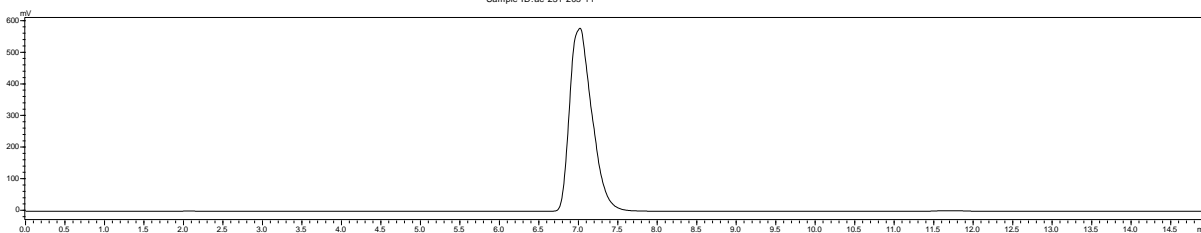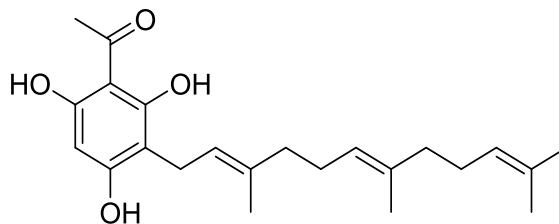

Supplement: np6b00347_si_001.pdf [file np6b00347_si_001.pdf]
